# Supplementary material for: Enhancing the phosphorescence decay pathway of Cu(i) emitters – the role of copper–iodide moiety
Source: Royal Society of Chemistry journal article supplement (doi:10.1039/d1dt03912a), 2021-12-06
Supplement: d1dt03912a1.pdf [file d1dt03912a1.pdf]

## Supporting Information

### Enhancing the Phosphorescence Decay Pathway of Cu(I) Emitters – The Role of Copper-Iodine Moiety

Giliandro Farias<sup>[a]</sup>, Cristian A.M. Salla<sup>[b]</sup>, Jéssica Toigo<sup>[a]</sup>, Luís Gustavo Teixeira Alves Duarte<sup>[c]</sup>, Adailton J. Bortoluzzi<sup>[a]</sup>, Edivandro Girotto<sup>[a]</sup>, Hugo Gallardo<sup>[a]</sup>, Teresa Dib Zambon Atvars<sup>[c]</sup>, Bernardo de Souza<sup>[a]\*</sup>, Ivan H. Bechtold<sup>[b]\*</sup>

<sup>[a]</sup>Chemistry Department, Universidade Federal de Santa Catarina, 88040-900, Florianópolis, SC, Brazil

<sup>[b]</sup>Physics Department, Universidade Federal de Santa Catarina, 88040-900, Florianópolis, SC, Brazil

<sup>[c]</sup>Chemistry Department, Universidade Estadual de Campinas, 13083-970, Campinas, SP, Brazil

\*Corresponding authors: [bernadsz@gmail.com](mailto:bernadsz@gmail.com) and [ivan.bechtold@ufsc.br](mailto:ivan.bechtold@ufsc.br)

- 1. Synthesis and Characterization**
- 2. NMR and IR Data**
- 3. Thermogravimetric Analyses and Cyclic Voltammetry Studies**
- 4. UV-Vis Absorption in Solution**
- 5. Theoretical Modeling**
- 6. X-Ray Crystallography**

## 1. Synthesis and Characterization

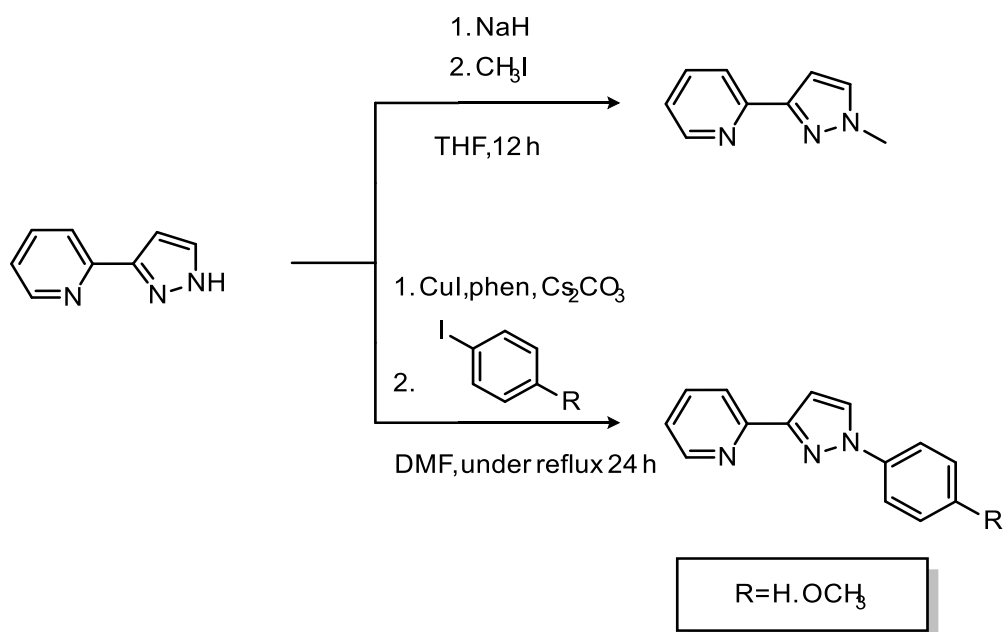

**Scheme S1.** Synthesis route to obtain the diimine ligands.

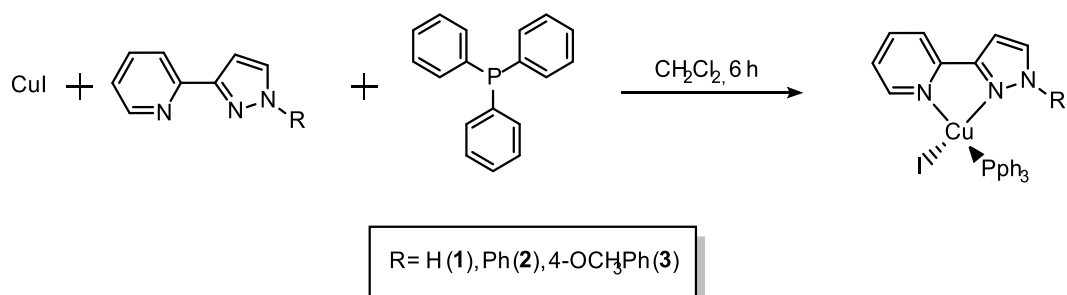

**Scheme S2.** Synthesis route to obtain complexes **1-3**.

## 2. NMR and IR Data

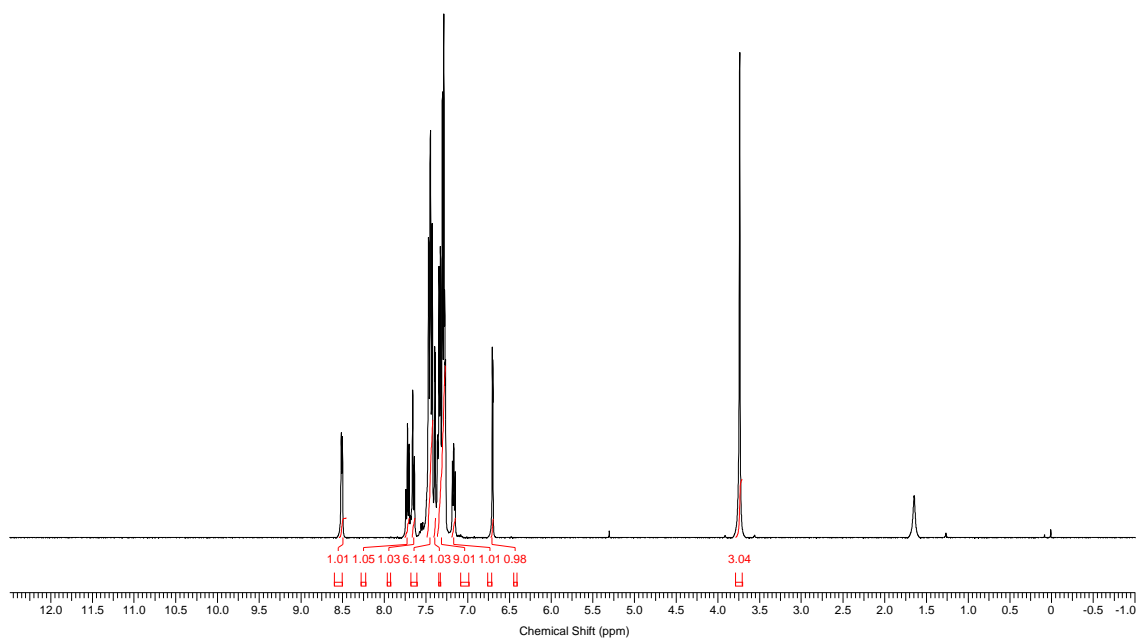

**Figure S1.** <sup>1</sup>H NMR spectrum (CDCl<sub>3</sub>, 400 MHz) of compound **1**.

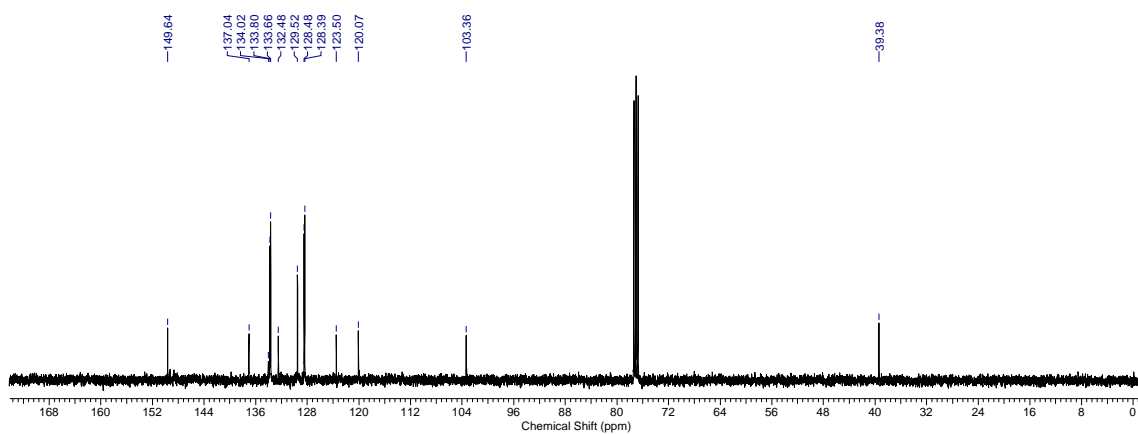

**Figure S2.** <sup>13</sup>C NMR spectrum (CDCl<sub>3</sub>, 100 MHz) of compound **1**.

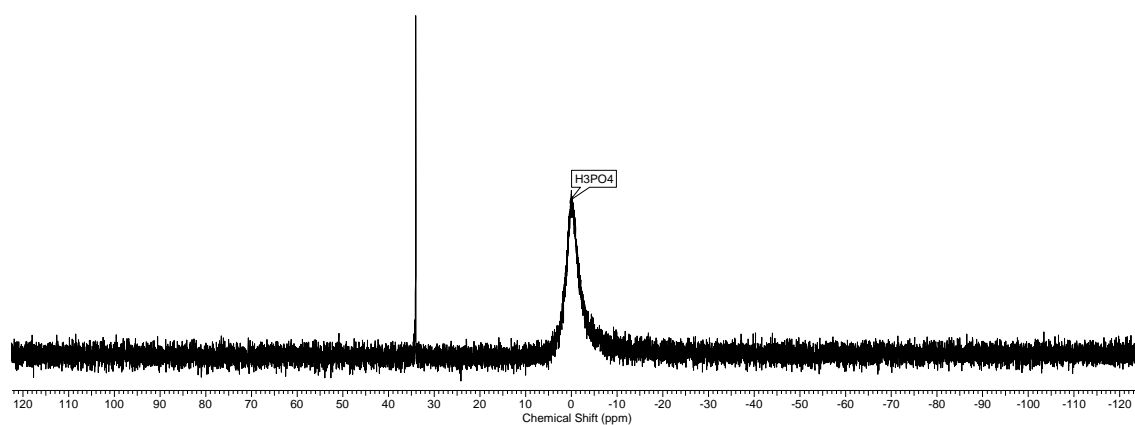

**Figure S3.** <sup>31</sup>P NMR spectrum (CDCl<sub>3</sub>, 162 MHz) of compound **1**.

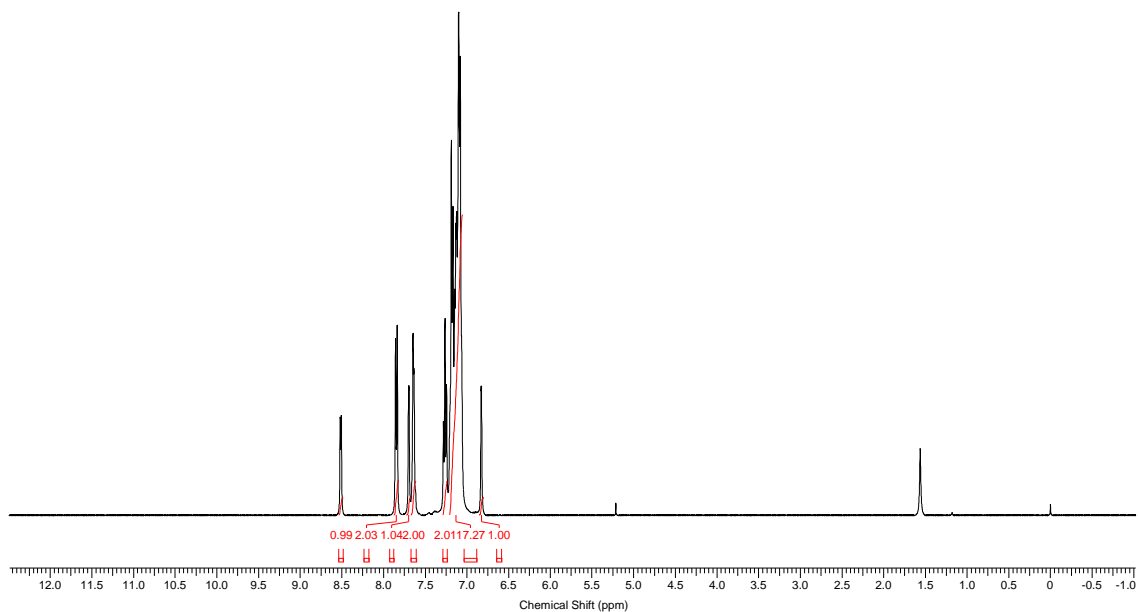

**Figure S4.**  $^1\text{H}$  NMR spectrum ( $\text{CDCl}_3$ , 400 MHz) of compound **2**.

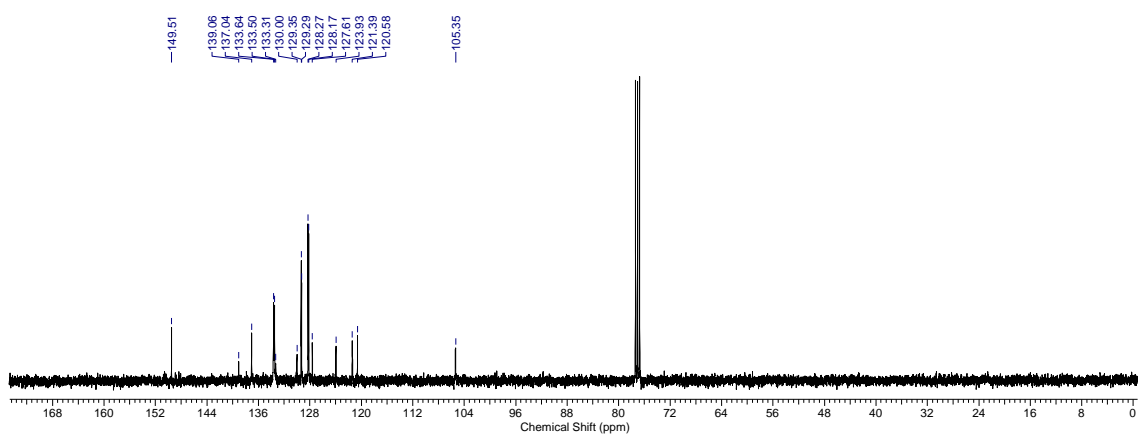

**Figure S5.**  $^{13}\text{C}$  NMR spectrum ( $\text{CDCl}_3$ , 100 MHz) of compound **2**.

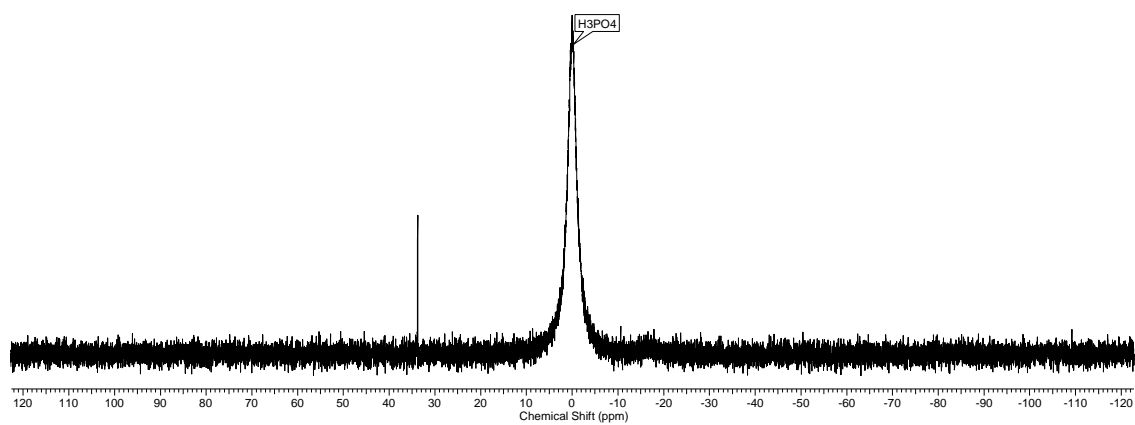

**Figure S6.**  $^{31}\text{P}$  NMR spectrum ( $\text{CDCl}_3$ , 162 MHz) of compound **2**.

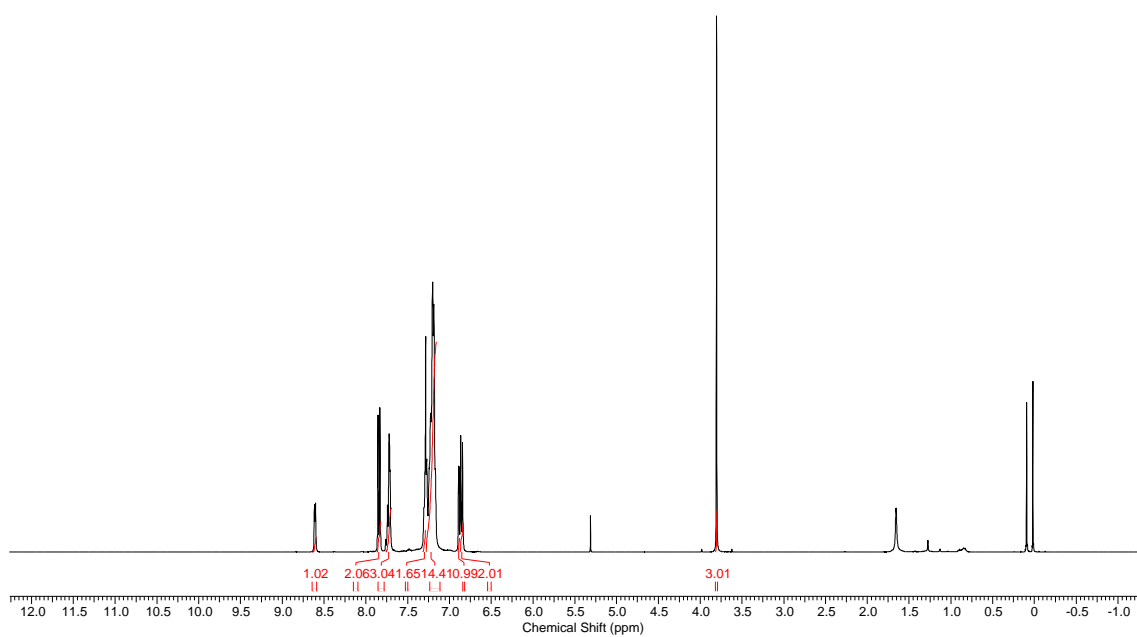

**Figure S7.**  $^1\text{H}$  NMR spectrum ( $\text{CDCl}_3$ , 400 MHz) of compound **3**.

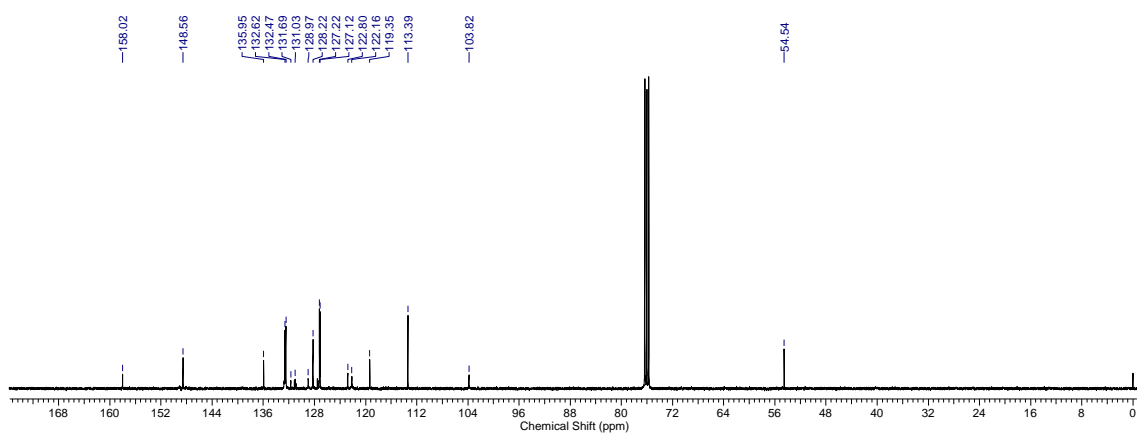

**Figure S8.**  $^{13}\text{C}$  NMR spectrum ( $\text{CDCl}_3$ , 100 MHz) of compound **3**.

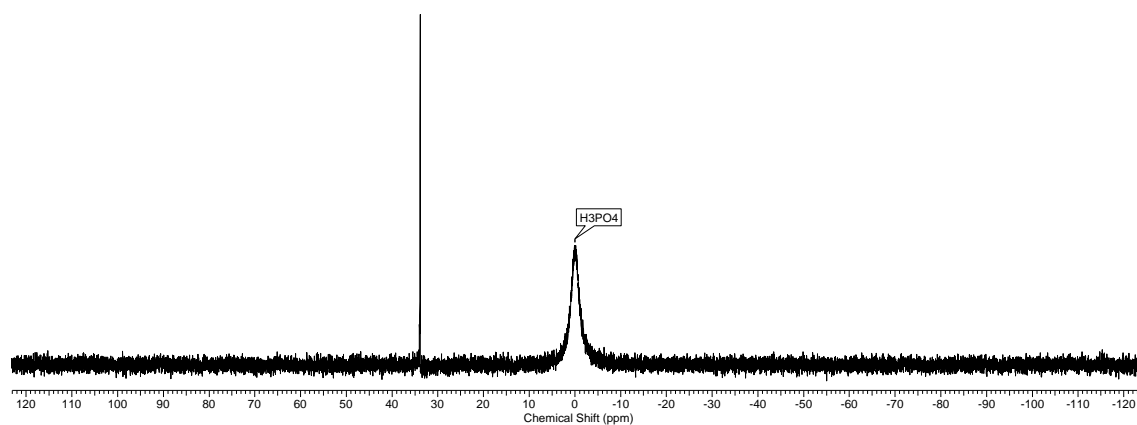

**Figure S9.**  $^{13}\text{C}$  NMR spectrum ( $\text{CDCl}_3$ , 162 MHz) of compound **3**.

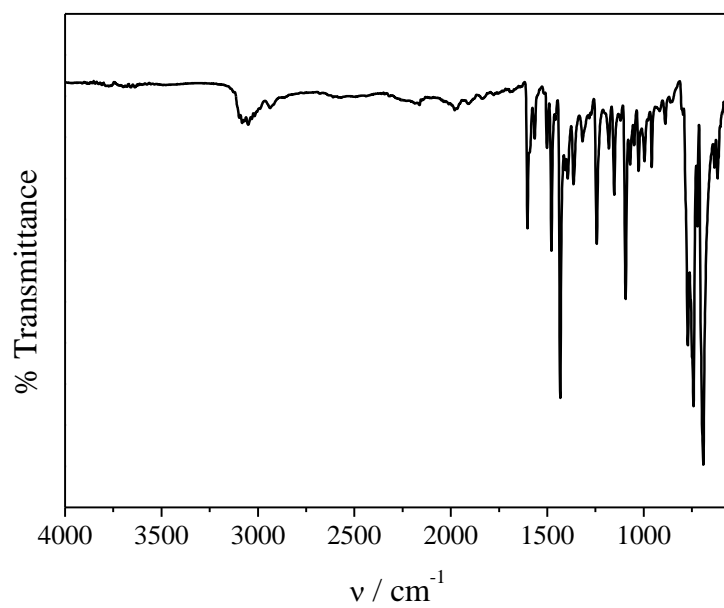

**Figure S10.** IR spectra of the complex **1**.

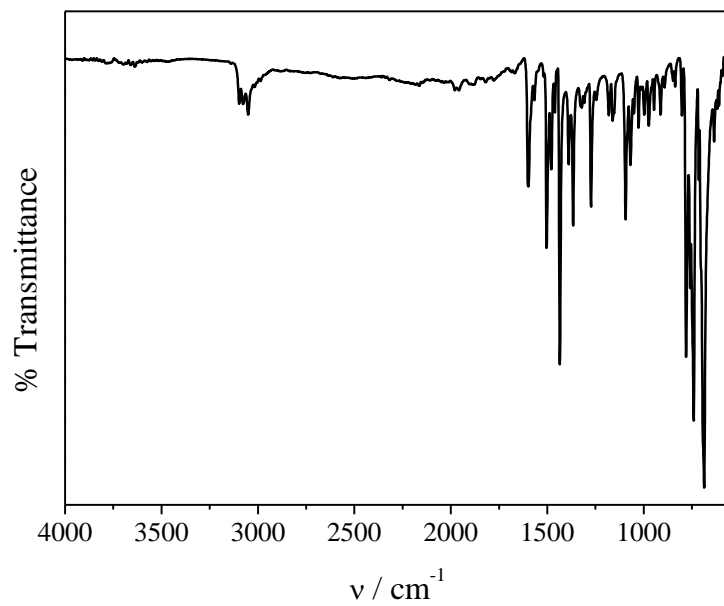

**Figure S11.** IR spectra of the complex **2**.

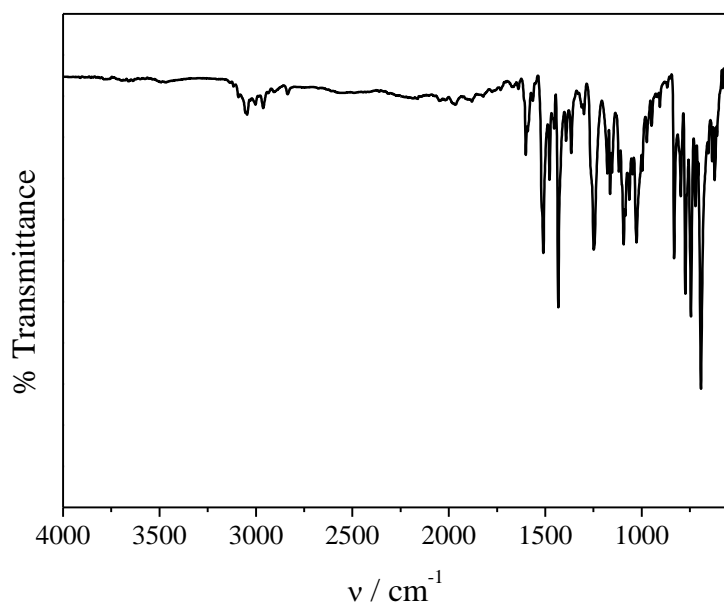

**Figure S12.** IR spectra of the complex **3**.

### 3. Thermogravimetric Analyses and Cyclic Voltammetry Studies

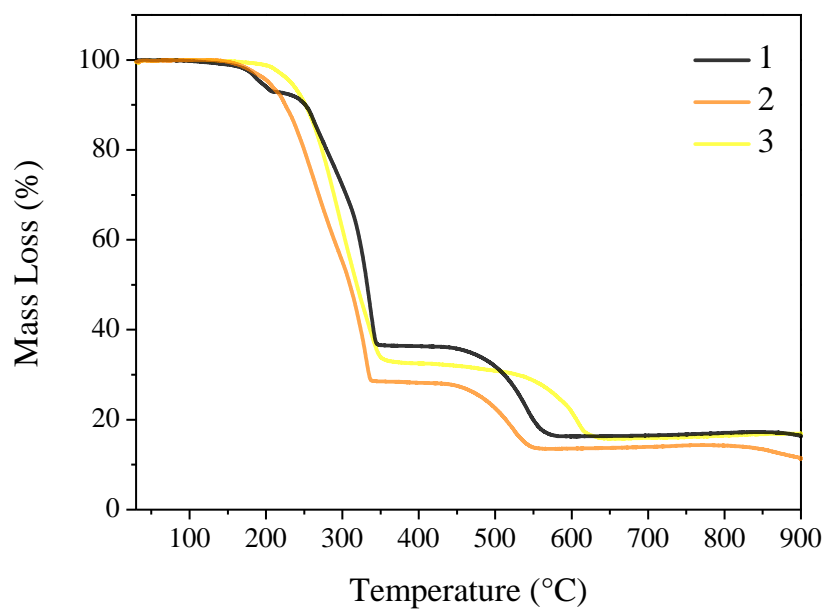

**Figure S13.** 1-3 thermogravimetric analysis (TGA) using a heating ramp of  $10\text{ }^{\circ}\text{C min}^{-1}$  under nitrogen atmosphere.

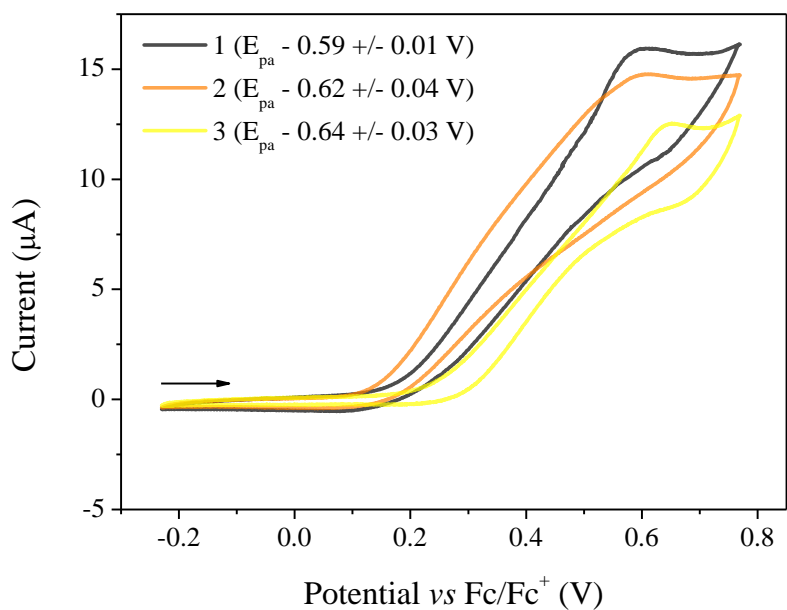

**Figure S14.** Cyclic voltammograms of the **1-3** complexes. Conditions: Working Electrode – Glassy Carbon; Reference Electrode - Ag/Ag<sup>+</sup>; Auxiliary Electrode - Platinum Wire; in dichloromethane solution, at 25 ± 1 ° C. The pair Fc/Fc<sup>+</sup> was used as an internal standard.

#### 4. UV-Vis Absorption in Solution

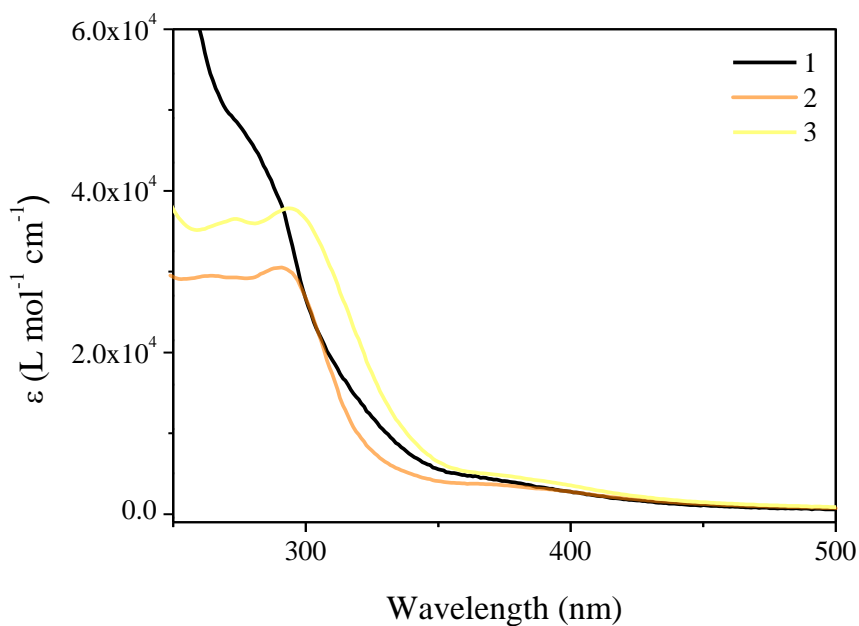

**Figure S15.** Optical absorption in dichloromethane solution  $1.0 \times 10^{-5}$  mol L<sup>-1</sup> of the Cu(I) complexes.



|   |                                                                                      |
|---|--------------------------------------------------------------------------------------|
| 4 | 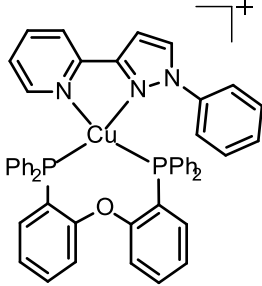   |
| 5 |    |
| 6 |   |
| 7 |  |
| 8 |  |
| 9 |  |

**Figure S16.** Molecular structure of the complexes discussed in Table 2 of the main text.

## 5. Theoretical Modeling

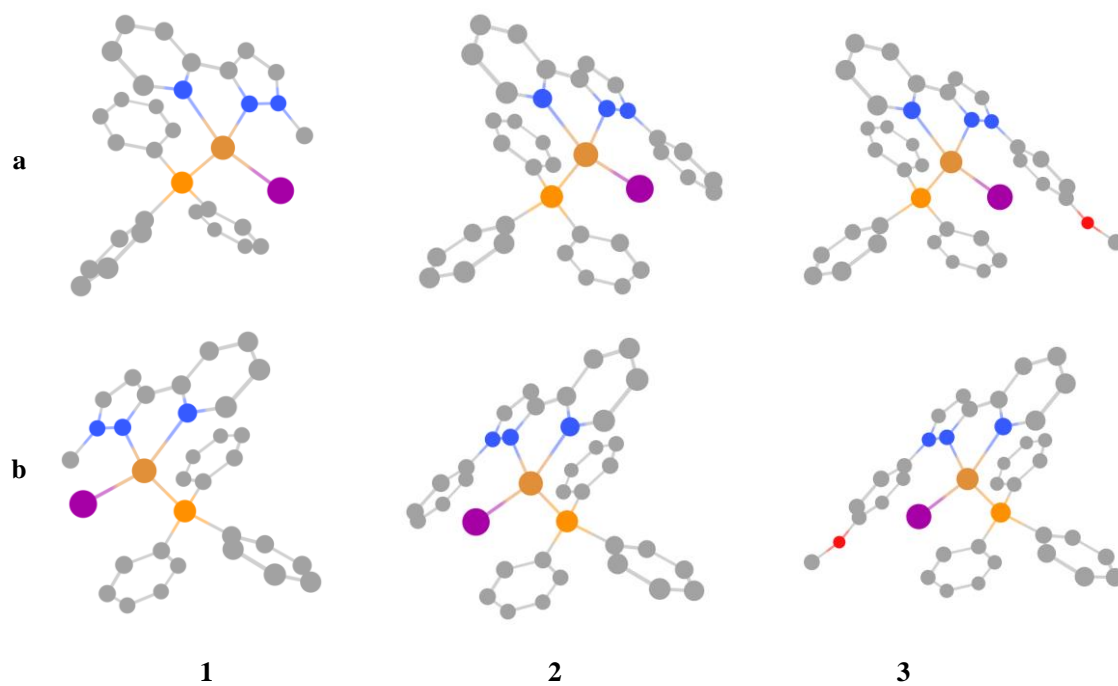

**Figure S17.** Optimized geometry for both isomers of complexes **1-3** obtained from DFT within PBE0/def2-TZVP(-f) and ZORA scalar-relativistic corrections level of theory.

**Table S1.** Selected bond lengths (Å), bond angles (°) and  $\tau_4$  geometry index at optimized  $S_0$  geometry for both isomers of complexes **1-3** within PBE0/def2-TZVP(-f) and ZORA scalar-relativistic corrections level of theory and experimentally determined by X-Ray diffractometry.

|                  | <b>1</b>   |                                        | <b>2</b>   |                                        | <b>3</b>                               |
|------------------|------------|----------------------------------------|------------|----------------------------------------|----------------------------------------|
|                  | <b>Exp</b> | <b>S<sub>0</sub></b><br><b>(1a/1b)</b> | <b>Exp</b> | <b>S<sub>0</sub></b><br><b>(2a/2b)</b> | <b>S<sub>0</sub></b><br><b>(3a/3b)</b> |
| Cu(1)-P(1)       | 2.2061(12) | 2.2047<br>2.2066                       | 2.1968(11) | 2.2029<br>2.2047                       | 2.1925<br>2.2020                       |
| Cu(1)-I(1)       | 2.6065(7)  | 2.5214<br>2.5269                       | 2.6127(6)  | 2.5286<br>2.5272                       | 2.5566<br>2.5320                       |
| Cu(1)-N(1)       | 2.069(4)   | 2.0739<br>2.0748                       | 2.062(3)   | 2.1349<br>2.1338                       | 2.1093<br>2.1246                       |
| Cu(1)-N(12)      | 2.121(4)   | 2.1462<br>2.1506                       | 2.116(3)   | 2.0935<br>2.0997                       | 2.1097<br>2.0981                       |
| P(1)-Cu(1)-I(1)  | 118.85(4)  | 122.60<br>120.70                       | 115.60(4)  | 121.02<br>121.10                       | 120.30<br>120.73                       |
| N(1)-Cu(1)-P(1)  | 122.31(11) | 105.66<br>107.40                       | 120.58(9)  | 102.27<br>101.63                       | 108.46<br>102.45                       |
| N(12)-Cu(1)-P(1) | 111.64(11) | 102.19<br>101.15                       | 120.43(10) | 108.76<br>107.50                       | 120.34<br>107.32                       |
| N(1)-Cu(1)-N(12) | 78.03(18)  | 77.00<br>77.03                         | 78.32(13)  | 77.23<br>77.28                         | 77.26<br>77.12                         |
| N(1)-Cu(1)-I(1)  | 106.35(12) | 118.56<br>115.78                       | 112.52(9)  | 123.69<br>123.66                       | 118.65<br>123.22                       |
| N(12)-Cu(1)-I(1) | 112.78(11) | 121.17<br>126.02                       | 102.98(10) | 115.34<br>116.89                       | 104.64<br>117.34                       |
| $\tau_4$         | 0.843      | 0.824<br>0.803                         | 0.844      | 0.818<br>0.817                         | 0.847<br>0.823                         |

**Table S2.** Selected bond lengths (Å), bond angles (°) and  $\tau_4$  geometry index at optimized T<sub>1</sub> geometry for both isomers of complexes **1-3** within PBE0/def2-TZVP(-f) and ZORA scalar-relativistic corrections level of theory and the root-mean-square deviation (RMSD) comparing the optimized T<sub>1</sub> and S<sub>0</sub> geometries.

|                  | <b>1</b> |          | <b>2</b> |          | <b>3</b> |          |
|------------------|----------|----------|----------|----------|----------|----------|
|                  | <b>a</b> | <b>b</b> | <b>a</b> | <b>b</b> | <b>a</b> | <b>b</b> |
| Cu(1)-P(1)       | 2.3194   | 2.3264   | 2.3046   | 2.336    | 2.3093   | 2.3403   |
| Cu(1)-I(1)       | 2.5759   | 2.5605   | 2.5015   | 2.5379   | 2.5071   | 2.5398   |
| Cu(1)-N(1)       | 1.9732   | 1.9837   | 2.1123   | 1.9441   | 2.0888   | 1.9408   |
| Cu(1)-N(12)      | 1.9504   | 1.9556   | 1.9311   | 1.9916   | 1.9291   | 1.9872   |
| P(1)-Cu(1)-I(1)  | 96.60    | 96.36    | 105.39   | 96.52    | 96.60    | 95.22    |
| N(1)-Cu(1)-P(1)  | 138.89   | 139.79   | 105.07   | 101.80   | 106.73   | 101.55   |
| N(12)-Cu(1)-P(1) | 98.88    | 98.16    | 94.79    | 132.02   | 94.83    | 134.91   |
| N(1)-Cu(1)-N(12) | 82.38    | 82.38    | 81.84    | 81.38    | 81.72    | 81.26    |
| N(1)-Cu(1)-I(1)  | 105.00   | 105.70   | 123.21   | 149.51   | 121.77   | 148.85   |
| N(12)-Cu(1)-I(1) | 145.88   | 145.66   | 140.47   | 104.00   | 141.31   | 104.98   |
| RMSD             | 1.0451   | 1.3850   | 0.5320   | 1.3418   | 0.5754   | 1.3818   |
| $\tau_4$         | 0.529    | 0.534    | 0.681    | 0.557    | 0.687    | 0.541    |

**Table S3.** Data for the TD-DFT excitations within PBE0/def2-TZVP(-f) and ZORA scalar-relativistic corrections level of theory for both isomers of complex **1**.

|           | State <sup>a</sup> | Energy |     |          | Configuration (%) <sup>b</sup> | TD-DFT<br>Difference Densities <sup>c</sup>                                           |
|-----------|--------------------|--------|-----|----------|--------------------------------|---------------------------------------------------------------------------------------|
|           |                    | eV     | nm  | <i>f</i> |                                |                                                                                       |
| <b>1a</b> | S <sub>1</sub>     | 3.098  | 400 | 0.0458   | H → L (93)                     | 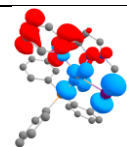   |
|           | S <sub>2</sub>     | 3.282  | 377 | 0.0020   | H-1 → L (91)                   |    |
|           | S <sub>3</sub>     | 3.508  | 353 | 0.0122   | H → L+1 (98)                   |    |
|           | S <sub>4</sub>     | 3.640  | 340 | 0.0016   | H → L+2 (91)                   |   |
|           | S <sub>5</sub>     | 3.740  | 332 | 0.0292   | H-2 → L (80)                   |  |
| <b>1b</b> | S <sub>1</sub>     | 3.082  | 402 | 0.0392   | H → L (93)                     |  |
|           | S <sub>2</sub>     | 3.238  | 383 | 0.0025   | H-1 → L (91)                   |  |
|           | S <sub>3</sub>     | 3.482  | 356 | 0.0124   | H → L+1 (98)                   |  |
|           | S <sub>4</sub>     | 3.671  | 338 | 0.0067   | H → L+2 (62)<br>H-2 → L (32)   |  |
|           | S <sub>5</sub>     | 3.720  | 333 | 0.0342   | H-2 → L (56)<br>H → L+2 (35)   |  |

<sup>a</sup> Vertical states taking S<sub>0</sub> geometry as the reference; <sup>b</sup> Transitions with high percentage contributions are shown in parenthesis; <sup>c</sup> For the TD-DFT difference densities between ground and specified excited-state hydrogen were omitted for clarity and blue indicates decreased and red indicates increased electronic density.

**Table S4.** Data for the TD-DFT excitations within PBE0/def2-TZVP(-f) and ZORA scalar-relativistic corrections level of theory for both isomers of complex **2**.

|           | State <sup>a</sup> | Energy |     |          | Configuration (%) <sup>b</sup> | TD-DFT<br>Difference Densities <sup>c</sup>                                           |
|-----------|--------------------|--------|-----|----------|--------------------------------|---------------------------------------------------------------------------------------|
|           |                    | eV     | nm  | <i>f</i> |                                |                                                                                       |
| <b>2a</b> | S <sub>1</sub>     | 2.969  | 417 | 0.0377   | H → L (92)                     | 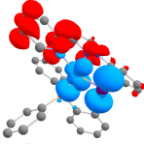   |
|           | S <sub>2</sub>     | 3.121  | 397 | 0.0124   | H-1 → L (89)                   |    |
|           | S <sub>3</sub>     | 3.542  | 350 | 0.0125   | H → L+1 (64)<br>H-2 → L (30)   |    |
|           | S <sub>4</sub>     | 3.553  | 349 | 0.0117   | H → L+1 (34)<br>H-2 → L (59)   |   |
|           | S <sub>5</sub>     | 3.639  | 341 | 0.0087   | H → L+2 (95)                   |  |
| <b>2b</b> | S <sub>1</sub>     | 2.994  | 414 | 0.0439   | H → L (92)                     |  |
|           | S <sub>2</sub>     | 3.115  | 398 | 0.0136   | H-1 → L (88)                   |  |
|           | S <sub>3</sub>     | 3.548  | 349 | 0.0105   | H-2 → L (88)                   |  |
|           | S <sub>4</sub>     | 3.581  | 346 | 0.0178   | H → L+1 (96)                   |  |
|           | S <sub>5</sub>     | 3.647  | 340 | 0.0101   | H → L+2 (96)                   |  |

<sup>a</sup> Vertical states taking S<sub>0</sub> geometry as the reference; <sup>b</sup> Transitions with high percentage contributions are shown in parenthesis; <sup>c</sup> For the TD-DFT difference densities between ground and specified excited-state hydrogen were omitted for clarity and blue indicates decreased and red indicates increased electronic density.

**Table S5.** Data for the TD-DFT excitations within PBE0/def2-TZVP(-f) and ZORA scalar-relativistic corrections level of theory for both isomers of complex **3**.

|           | State <sup>a</sup> | Energy |     |          | Configuration (%) <sup>b</sup> | TD-DFT<br>Difference Densities <sup>c</sup>                                           |
|-----------|--------------------|--------|-----|----------|--------------------------------|---------------------------------------------------------------------------------------|
|           |                    | eV     | nm  | <i>f</i> |                                |                                                                                       |
| <b>3a</b> | S <sub>1</sub>     | 3.013  | 412 | 0.0428   | H → L (93)                     | 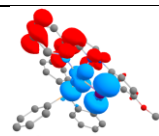   |
|           | S <sub>2</sub>     | 3.154  | 393 | 0.0083   | H-1 → L (90)                   |    |
|           | S <sub>3</sub>     | 3.523  | 352 | 0.0144   | H → L+1 (97)                   |    |
|           | S <sub>4</sub>     | 3.587  | 345 | 0.0070   | H-2 → L (80)                   |    |
|           | S <sub>5</sub>     | 3.655  | 339 | 0.0038   | H → L+2 (94)                   |   |
| <b>3b</b> | S <sub>1</sub>     | 3.030  | 409 | 0.0461   | H → L (91)                     |  |
|           | S <sub>2</sub>     | 3.156  | 393 | 0.0127   | H-1 → L (88)                   |  |
|           | S <sub>3</sub>     | 3.567  | 348 | 0.0173   | H → L+1 (96)                   |  |
|           | S <sub>4</sub>     | 3.591  | 345 | 0.0071   | H-2 → L(79)                    |  |
|           | S <sub>5</sub>     | 3.649  | 340 | 0.0056   | H → L+2 (94)                   |  |

<sup>a</sup> Vertical states taking S<sub>0</sub> geometry as the reference; <sup>b</sup> Transitions with high percentage contributions are shown in parenthesis; <sup>c</sup> For the TD-DFT difference densities between ground and specified excited-state hydrogen were omitted for clarity and blue indicates decreased and red indicates increased electronic density.

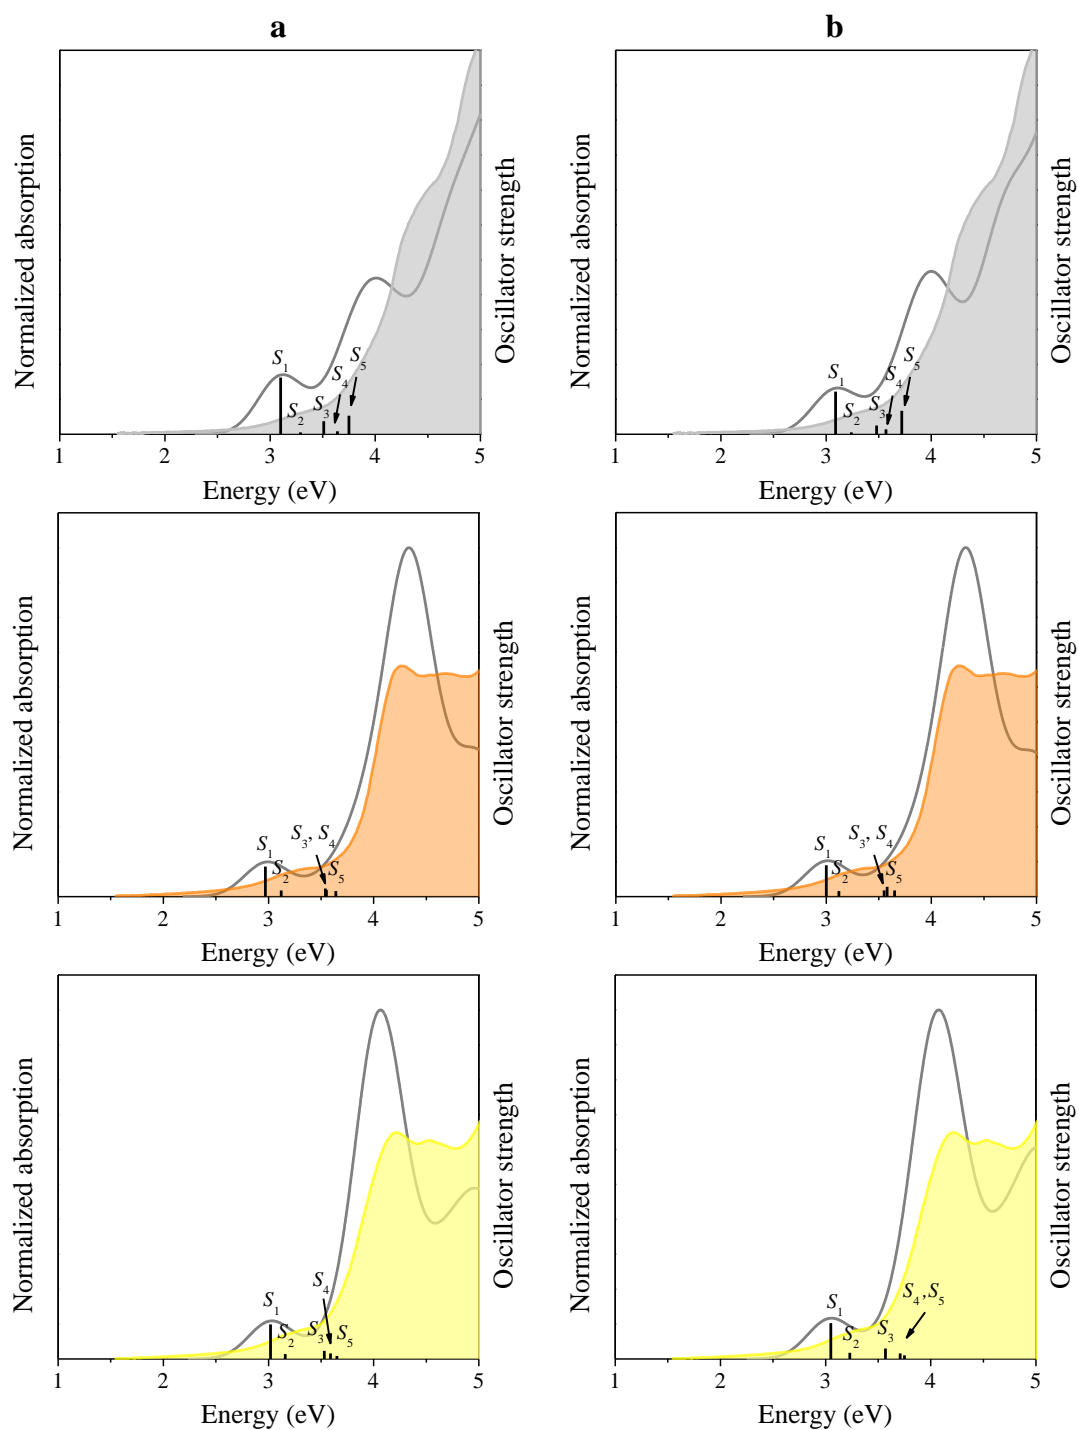

**Figure S18.** Experimental absorption spectra of **1-3** in  $\text{CH}_2\text{Cl}_2$  (filled curves) and the theoretical absorption spectra (gray solid curves) for both respectively isomers **a** and **b** calculated within PBE0/def2-TZVP(-f) and ZORA scalar-relativistic corrections level of theory and convoluted with Gaussians of 0.50 eV width.



**Table S6.** Data for the SOC-TD-DFT triplet excitations within PBE0/def2-TZVP(-f) and ZORA scalar-relativistic corrections level of theory for both isomers of complex **1**.

|           | State <sup>a</sup> | Energy |     | $f^b$                  | Configuration (%) <sup>c</sup> | TD-DFT Difference Densities <sup>d</sup>                                              |
|-----------|--------------------|--------|-----|------------------------|--------------------------------|---------------------------------------------------------------------------------------|
|           |                    | eV     | nm  |                        |                                |                                                                                       |
| <b>1a</b> | T <sub>1</sub>     | 2.809  | 443 | $1.452 \times 10^{-5}$ | H → L (90)                     | 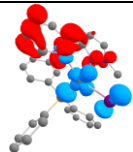   |
|           | T <sub>2</sub>     | 3.131  | 397 | $1.219 \times 10^{-2}$ | H-1 → L (83)                   |    |
|           | T <sub>3</sub>     | 3.382  | 367 | $1.931 \times 10^{-5}$ | H → L+1 (85)                   |    |
| <b>1b</b> | T <sub>1</sub>     | 2.832  | 440 | $1.772 \times 10^{-5}$ | H → L (92)                     |   |
|           | T <sub>2</sub>     | 3.073  | 404 | $8.352 \times 10^{-3}$ | H-1 → L (85)                   |  |
|           | T <sub>3</sub>     | 3.357  | 370 | $1.372 \times 10^{-5}$ | H → L+1 (84)                   |  |

<sup>a</sup> Vertical states taking  $S_0$  geometry as the reference; <sup>b</sup>  $f$  for the triplet states are shown as an average of the substates  $x$ ,  $y$  and  $z$ ; <sup>c</sup> Transitions with high percentage contributions are shown in parenthesis; <sup>d</sup> For the TD-DFT difference densities between ground and specified excited-state hydrogen were omitted for clarity and blue indicates decreased and red indicates increased electronic density.

**Table S7.** Data for the SOC-TD-DFT triplet excitations within PBE0/def2-TZVP(-f) and ZORA scalar-relativistic corrections level of theory for both isomers of complex **2**.

|           | State <sup>a</sup> | Energy |     | $f^b$                  | Configuration (%) <sup>c</sup>               | TD-DFT Difference Densities <sup>d</sup>                                              |
|-----------|--------------------|--------|-----|------------------------|----------------------------------------------|---------------------------------------------------------------------------------------|
|           |                    | eV     | nm  |                        |                                              |                                                                                       |
| <b>2a</b> | T <sub>1</sub>     | 2.709  | 461 | $2.515 \times 10^{-5}$ | H → L (95)                                   | 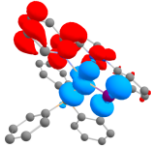   |
|           | T <sub>2</sub>     | 2.936  | 425 | $6.669 \times 10^{-3}$ | H-1 → L (88)                                 |    |
|           | T <sub>3</sub>     | 3.357  | 369 | $2.614 \times 10^{-4}$ | H-5 → L (18)<br>H-3 → L (28)<br>H-2 → L (33) |    |
| <b>2b</b> | T <sub>1</sub>     | 2.725  | 458 | $2.621 \times 10^{-5}$ | H → L (95)                                   |   |
|           | T <sub>2</sub>     | 2.932  | 426 | $4.914 \times 10^{-3}$ | H-1 → L (88)                                 |  |
|           | T <sub>3</sub>     | 3.349  | 370 | $3.318 \times 10^{-4}$ | H-4 → L (12)<br>H-3 → L (27)<br>H-2 → L (34) |  |

<sup>a</sup> Vertical states taking  $S_0$  geometry as the reference; <sup>b</sup>  $f$  for the triplet states are shown as an average of the substates x, y and z; <sup>c</sup> Transitions with high percentage contributions are shown in parenthesis; <sup>d</sup> For the TD-DFT difference densities between ground and specified excited-state hydrogen were omitted for clarity and blue indicates decreased and red indicates increased electronic density.

**Table S8.** Data for the SOC-TD-DFT triplet excitations within PBE0/def2-TZVP(-f) and ZORA scalar-relativistic corrections level of theory for both isomers of complex **3**.

|           | State <sup>a</sup> | Energy |     | $f^b$                  | Configuration (%) <sup>c</sup> | TD-DFT Difference Densities <sup>d</sup>                                              |
|-----------|--------------------|--------|-----|------------------------|--------------------------------|---------------------------------------------------------------------------------------|
|           |                    | eV     | nm  |                        |                                |                                                                                       |
| <b>3a</b> | T <sub>1</sub>     | 2.749  | 454 | $8.595 \times 10^{-6}$ | H → L (95)                     | 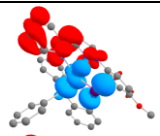   |
|           | T <sub>2</sub>     | 2.972  | 420 | $6.023 \times 10^{-3}$ | H-1 → L (88)                   |    |
|           | T <sub>3</sub>     | 3.297  | 376 | $1.441 \times 10^{-4}$ | H-2 → L (33)<br>H-3 → L (37)   |    |
| <b>3b</b> | T <sub>1</sub>     | 2.760  | 452 | $1.068 \times 10^{-5}$ | H → L (95)                     |   |
|           | T <sub>2</sub>     | 2.968  | 419 | $4.819 \times 10^{-3}$ | H-1 → L (88)                   |  |
|           | T <sub>3</sub>     | 3.296  | 376 | $2.036 \times 10^{-4}$ | H-2 → L (36)<br>H-3 → L (35)   |  |

<sup>a</sup> Vertical states taking S<sub>0</sub> geometry as the reference; <sup>b</sup>  $f$  for the triplet states are shown as an average of the substates x, y and z; <sup>c</sup> Transitions with high percentage contributions are shown in parenthesis; <sup>d</sup> For the TD-DFT difference densities between ground and specified excited-state hydrogen were omitted for clarity and blue indicates decreased and red indicates increased electronic density.

**Table S9.** Comparison between theoretical prompt fluorescence rates and the experimental one determined from the Boltzmann type equation for **1-3**.

| Complex   | $ \langle I \mu F\rangle ^2$ | $k_{\text{PF}}^{\text{THEO}}$ (s <sup>-1</sup> ) | Complex | $k_{\text{PF}}^{\text{EXP}}$ (s <sup>-1</sup> ) |
|-----------|------------------------------|--------------------------------------------------|---------|-------------------------------------------------|
| <b>1a</b> | 0.6151                       | $3.91 \times 10^7$                               | 1       | $1.88 \times 10^6$                              |
| <b>1b</b> | 0.5134                       | $3.21 \times 10^7$                               |         |                                                 |
| <b>2a</b> | 0.5123                       | $2.88 \times 10^7$                               | 2       | $1.04 \times 10^6$                              |
| <b>2b</b> | 0.5964                       | $3.42 \times 10^7$                               |         |                                                 |
| <b>3a</b> | 0.5767                       | $3.37 \times 10^7$                               | 3       | $3.33 \times 10^6$                              |
| <b>3b</b> | 0.6179                       | $3.89 \times 10^7$                               |         |                                                 |

<sup>a</sup> Determine using  $k_{\text{PF}}^{\text{THEO}} = 2.136 \times 10^{10} \times |\langle I|\mu|F\rangle|^2 \times \Delta E(S_1)^3 \times \eta^2$ , and setting  $\eta^2$  as 2.016.

**Table S10.** Theoretical and experimental singlet and triplet energies and  $\Delta E(S_1-T_1)$  for complexes **1-3**.

| Theoretical                                            | <b>1a</b> | <b>2a</b> | <b>3a</b> |
|--------------------------------------------------------|-----------|-----------|-----------|
| <b>S<sub>1</sub><sup>a</sup> / eV</b>                  | 3.098     | 2.969     | 3.013     |
| <b>T<sub>1</sub><sup>b</sup> / eV</b>                  | 2.809     | 2.709     | 2.749     |
| <b><math>\Delta E(S_1-T_1)</math><sup>b</sup> / eV</b> | 0.289     | 0.260     | 0.264     |
| Experimental                                           | <b>1</b>  | <b>2</b>  | <b>3</b>  |
| <b>S<sub>1</sub><sup>c</sup> / eV</b>                  | 2.58      | 2.57      | 2.55      |
| <b>T<sub>1</sub><sup>c</sup> / eV</b>                  | 2.39      | 2.40      | 2.36      |
| <b><math>\Delta E(S_1-T_1)</math><sup>d</sup> / eV</b> | 0.19      | 0.17      | 0.19      |

<sup>a</sup> Vertical energy difference from TD-DFT; <sup>b</sup> Vertical energy difference from SOC-TD-DFT; <sup>c</sup> Experimental data obtained from the onset of the emission spectra at room temperature and 77 K; <sup>d</sup>  $\Delta E(S_1-T_1)$  obtained from the difference between the  $S_1$  and  $T_1$  energies.

**Table S11.** Data of SOCME (in  $\text{cm}^{-1}$ ) at optimized  $S_0$  geometry within PBE0/def2-TZVP(-f) and ZORA scalar-relativistic corrections level of theory for both isomers of complexes **1-3**.

|                                                                                       | <b>1a</b> | <b>1b</b> | <b>2a</b> | <b>2b</b> | <b>3a</b> | <b>3b</b> |
|---------------------------------------------------------------------------------------|-----------|-----------|-----------|-----------|-----------|-----------|
| $\langle \mathbf{T}_1   \mathbf{H}_{S_0}   \mathbf{S}_0 \rangle^a$                    | 46.63     | 44.44     | 26.59     | 30.14     | 21.33     | 23.75     |
| $\langle \mathbf{T}_1   \mathbf{H}_{S_0}   \mathbf{S}_1 \rangle^a$                    | 38.81     | 20.74     | 73.62     | 77.49     | 51.60     | 72.08     |
| $\langle \mathbf{T}_1   \mathbf{H}_{S_0}   \mathbf{S}_2 \rangle^a$                    | 399.10    | 416.55    | 392.40    | 385.63    | 378.67    | 380.72    |
| $\langle \mathbf{T}_1   \mathbf{H}_{S_0}   \mathbf{S}_3 \rangle^a$                    | 16.44     | 18.76     | 201.53    | 359.48    | 28.81     | 49.63     |
| $\langle \mathbf{T}_1   \mathbf{H}_{S_0}   \mathbf{S}_4 \rangle^a$                    | 53.73     | 156.60    | 274.98    | 58.98     | 319.30    | 330.84    |
| $\langle \mathbf{T}_1   \mathbf{H}_{S_0}   \mathbf{S}_5 \rangle^a$                    | 253.99    | 217.04    | 53.57     | 41.18     | 53.15     | 53.33     |
| $\langle \mathbf{T}_2   \mathbf{H}_{S_0}   \mathbf{S}_0 \rangle^a$                    | 87.21     | 85.62     | 58.63     | 56.32     | 59.72     | 58.84     |
| $\langle \mathbf{T}_2   \mathbf{H}_{S_0}   \mathbf{S}_1 \rangle^a$                    | 471.44    | 479.65    | 455.35    | 456.28    | 445.90    | 448.44    |
| $\langle \mathbf{T}_2   \mathbf{H}_{S_0}   \mathbf{S}_2 \rangle^a$                    | 30.45     | 37.92     | 135.65    | 152.00    | 105.16    | 134.16    |
| $\langle \mathbf{T}_2   \mathbf{H}_{S_0}   \mathbf{S}_3 \rangle^a$                    | 11.36     | 14.40     | 233.27    | 405.14    | 36.13     | 53.70     |
| $\langle \mathbf{T}_2   \mathbf{H}_{S_0}   \mathbf{S}_4 \rangle^a$                    | 108.61    | 226.35    | 306.34    | 59.27     | 371.63    | 376.73    |
| $\langle \mathbf{T}_2   \mathbf{H}_{S_0}   \mathbf{S}_5 \rangle^a$                    | 355.76    | 263.30    | 37.09     | 35.08     | 34.78     | 36.55     |
| $\langle \mathbf{T}_3   \mathbf{H}_{S_0}   \mathbf{S}_0 \rangle^a$                    | 28.84     | 39.48     | 36.76     | 39.12     | 24.61     | 26.17     |
| $\langle \mathbf{T}_3   \mathbf{H}_{S_0}   \mathbf{S}_1 \rangle^a$                    | 37.96     | 27.72     | 281.33    | 302.85    | 159.38    | 172.11    |
| $\langle \mathbf{T}_3   \mathbf{H}_{S_0}   \mathbf{S}_2 \rangle^a$                    | 15.81     | 17.46     | 262.97    | 273.97    | 136.97    | 149.58    |
| $\langle \mathbf{T}_3   \mathbf{H}_{S_0}   \mathbf{S}_3 \rangle^a$                    | 15.47     | 11.34     | 16.37     | 28.90     | 3.43      | 1.37      |
| $\langle \mathbf{T}_3   \mathbf{H}_{S_0}   \mathbf{S}_4 \rangle^a$                    | 15.31     | 13.81     | 23.68     | 7.52      | 26.09     | 24.85     |
| $\langle \mathbf{T}_3   \mathbf{H}_{S_0}   \mathbf{S}_5 \rangle^a$                    | 36.96     | 22.96     | 37.03     | 37.18     | 22.10     | 22.61     |
| $\Sigma \langle \mathbf{T}_{1-3}   \hat{\mathbf{H}}_{S_0}   \mathbf{S}_{1-5} \rangle$ | 1861.25   | 1944.65   | 2785.18   | 2697.44   | 2173.12   | 2306.71   |
| $\Sigma \langle \mathbf{T}_{1-2}   \hat{\mathbf{H}}_{S_0}   \mathbf{S}_1 \rangle$     | 510.25    | 500.39    | 528.96    | 550.23    | 497.51    | 520.52    |

<sup>a</sup>  $\sqrt{\langle (\mathbf{S}_i | \mathbf{H}_{S_0} | \mathbf{T}_j)_{(MS=0,\pm 1)} \rangle^2}$  in the  $S_0$  geometry.

**Table S12.** Data of SOCME (in cm<sup>-1</sup>) at optimized T<sub>1</sub> geometry within PBE0/def2-TZVP(-f) and ZORA scalar-relativistic corrections level of theory for both isomers of complexes **1-3**.

|                                                                                             | <b>1a</b> | <b>1b</b> | <b>2a</b> | <b>2b</b> | <b>3a</b> | <b>3b</b> |
|---------------------------------------------------------------------------------------------|-----------|-----------|-----------|-----------|-----------|-----------|
| $\langle \mathbf{T}_1   \mathbf{H}_{\text{SO}}   \mathbf{S}_0 \rangle^a$                    | 70.30     | 72.38     | 51.71     | 64.36     | 52.21     | 64.08     |
| $\langle \mathbf{T}_1   \mathbf{H}_{\text{SO}}   \mathbf{S}_1 \rangle^a$                    | 21.55     | 28.02     | 25.39     | 36.34     | 26.55     | 36.98     |
| $\langle \mathbf{T}_1   \mathbf{H}_{\text{SO}}   \mathbf{S}_2 \rangle^a$                    | 27.64     | 24.34     | 387.51    | 369.59    | 373.18    | 363.15    |
| $\langle \mathbf{T}_1   \mathbf{H}_{\text{SO}}   \mathbf{S}_3 \rangle^a$                    | 363.47    | 368.49    | 87.96     | 53.77     | 52.11     | 5.62      |
| $\langle \mathbf{T}_1   \mathbf{H}_{\text{SO}}   \mathbf{S}_4 \rangle^a$                    | 99.13     | 13.11     | 237.73    | 241.35    | 203.75    | 62.83     |
| $\langle \mathbf{T}_1   \mathbf{H}_{\text{SO}}   \mathbf{S}_5 \rangle^a$                    | 13.34     | 294.91    | 20.10     | 337.46    | 129.13    | 398.99    |
| $\langle \mathbf{T}_2   \mathbf{H}_{\text{SO}}   \mathbf{S}_0 \rangle^a$                    | 169.08    | 143.28    | 94.82     | 119.64    | 94.73     | 113.75    |
| $\langle \mathbf{T}_2   \mathbf{H}_{\text{SO}}   \mathbf{S}_1 \rangle^a$                    | 308.71    | 263.81    | 400.63    | 335.94    | 381.47    | 325.51    |
| $\langle \mathbf{T}_2   \mathbf{H}_{\text{SO}}   \mathbf{S}_2 \rangle^a$                    | 24.19     | 12.20     | 149.85    | 189.64    | 152.04    | 226.06    |
| $\langle \mathbf{T}_2   \mathbf{H}_{\text{SO}}   \mathbf{S}_3 \rangle^a$                    | 239.87    | 246.25    | 168.44    | 55.53     | 97.33     | 16.65     |
| $\langle \mathbf{T}_2   \mathbf{H}_{\text{SO}}   \mathbf{S}_4 \rangle^a$                    | 120.97    | 42.83     | 452.24    | 482.58    | 414.09    | 68.89     |
| $\langle \mathbf{T}_2   \mathbf{H}_{\text{SO}}   \mathbf{S}_5 \rangle^a$                    | 27.32     | 427.29    | 5.94      | 609.28    | 223.43    | 766.69    |
| $\langle \mathbf{T}_3   \mathbf{H}_{\text{SO}}   \mathbf{S}_0 \rangle^a$                    | 62.40     | 116.83    | 25.44     | 41.45     | 24.25     | 48.02     |
| $\langle \mathbf{T}_3   \mathbf{H}_{\text{SO}}   \mathbf{S}_1 \rangle^a$                    | 140.98    | 224.82    | 234.09    | 47.43     | 224.31    | 44.88     |
| $\langle \mathbf{T}_3   \mathbf{H}_{\text{SO}}   \mathbf{S}_2 \rangle^a$                    | 17.36     | 18.95     | 375.01    | 36.67     | 321.51    | 35.18     |
| $\langle \mathbf{T}_3   \mathbf{H}_{\text{SO}}   \mathbf{S}_3 \rangle^a$                    | 134.20    | 250.41    | 30.41     | 14.49     | 17.95     | 9.82      |
| $\langle \mathbf{T}_3   \mathbf{H}_{\text{SO}}   \mathbf{S}_4 \rangle^a$                    | 55.81     | 21.38     | 150.35    | 64.40     | 129.98    | 7.99      |
| $\langle \mathbf{T}_3   \mathbf{H}_{\text{SO}}   \mathbf{S}_5 \rangle^a$                    | 9.65      | 370.81    | 9.25      | 88.12     | 82.96     | 51.84     |
| $\Sigma \langle \mathbf{T}_{1-3}   \hat{\mathbf{H}}_{\text{SO}}   \mathbf{S}_{1-5} \rangle$ | 1604.18   | 2607.62   | 2734.90   | 2962.58   | 2829.78   | 2421.07   |
| $\Sigma \langle \mathbf{T}_{1-2}   \hat{\mathbf{H}}_{\text{SO}}   \mathbf{S}_1 \rangle$     | 385.03    | 291.83    | 426.02    | 372.28    | 408.02    | 362.48    |

<sup>a</sup>  $\sqrt{\langle (\mathbf{S}_i | \mathbf{H}_{\text{SO}} | \mathbf{T}_j)_{(\text{MS}=0,\pm 1)} \rangle^2}$  in the T<sub>1</sub> geometry.

**Table S13.** Comparison between theoretical phosphorescence rates and the experimental one obtained from the Boltzmann type equation for **1-3**.

| <b>Complex</b>                   | <b>T<sub>1</sub> (eV)<sup>a</sup></b> | <b>k<sub>Phosp</sub><sup>THEO</sup> <sup>b</sup> (s<sup>-1</sup>)</b> | <b>Complex</b>                   | <b>k<sub>Phosp</sub><sup>EXP</sup> (s<sup>-1</sup>)</b> |
|----------------------------------|---------------------------------------|-----------------------------------------------------------------------|----------------------------------|---------------------------------------------------------|
| <b>1a</b>                        | 2.13                                  | 0.55 × 10 <sup>4</sup>                                                | <b>1</b>                         | 0.97 × 10 <sup>4</sup>                                  |
| <b>1b</b>                        | 2.16                                  | 0.63 × 10 <sup>4</sup>                                                |                                  |                                                         |
| <b>2a</b>                        | 2.33                                  | 2.96 × 10 <sup>4</sup>                                                | <b>2</b>                         | 1.26 × 10 <sup>4</sup>                                  |
| <b>2b</b>                        | 2.14                                  | 1.77 × 10 <sup>4</sup>                                                |                                  |                                                         |
| <b>3a</b>                        | 2.29                                  | 1.87 × 10 <sup>4</sup>                                                | <b>3</b>                         | 0.99 × 10 <sup>4</sup>                                  |
| <b>3b</b>                        | 2.10                                  | 1.45 × 10 <sup>4</sup>                                                |                                  |                                                         |
| <b>Cu(phen)(POP)<sup>+</sup></b> | 2.18                                  | 2.60 × 10 <sup>3</sup>                                                | <b>Cu(phen)(POP)<sup>+</sup></b> | 2.69 × 10 <sup>3</sup>                                  |
| <b>Ir(bp)<sub>2</sub>(acac)</b>  | 1.87                                  | 1.56 × 10 <sup>5</sup>                                                | <b>Ir(bp)<sub>2</sub>(acac)</b>  | 9.26 × 10 <sup>4</sup>                                  |

<sup>a</sup> Adiabatic energy; <sup>b</sup> Determined using  $k_{\text{Phosp}} = \frac{\eta^3 E(T_j)^3}{1.5} \left\{ \sum_n \frac{\langle T_j | \hat{H}_{\text{SO}} | S_n \rangle}{E(S_n) - E(T_j)} \times \left( \frac{f_n}{E(S_n)} \right)^{\frac{1}{2}} \right\}^2$ . The T<sub>1</sub> state adiabatic energy was used,  $\eta^3$  set as 2.887 for the copper complexes and 2.785 for the iridium complex.

## 6. X-Ray Crystallography

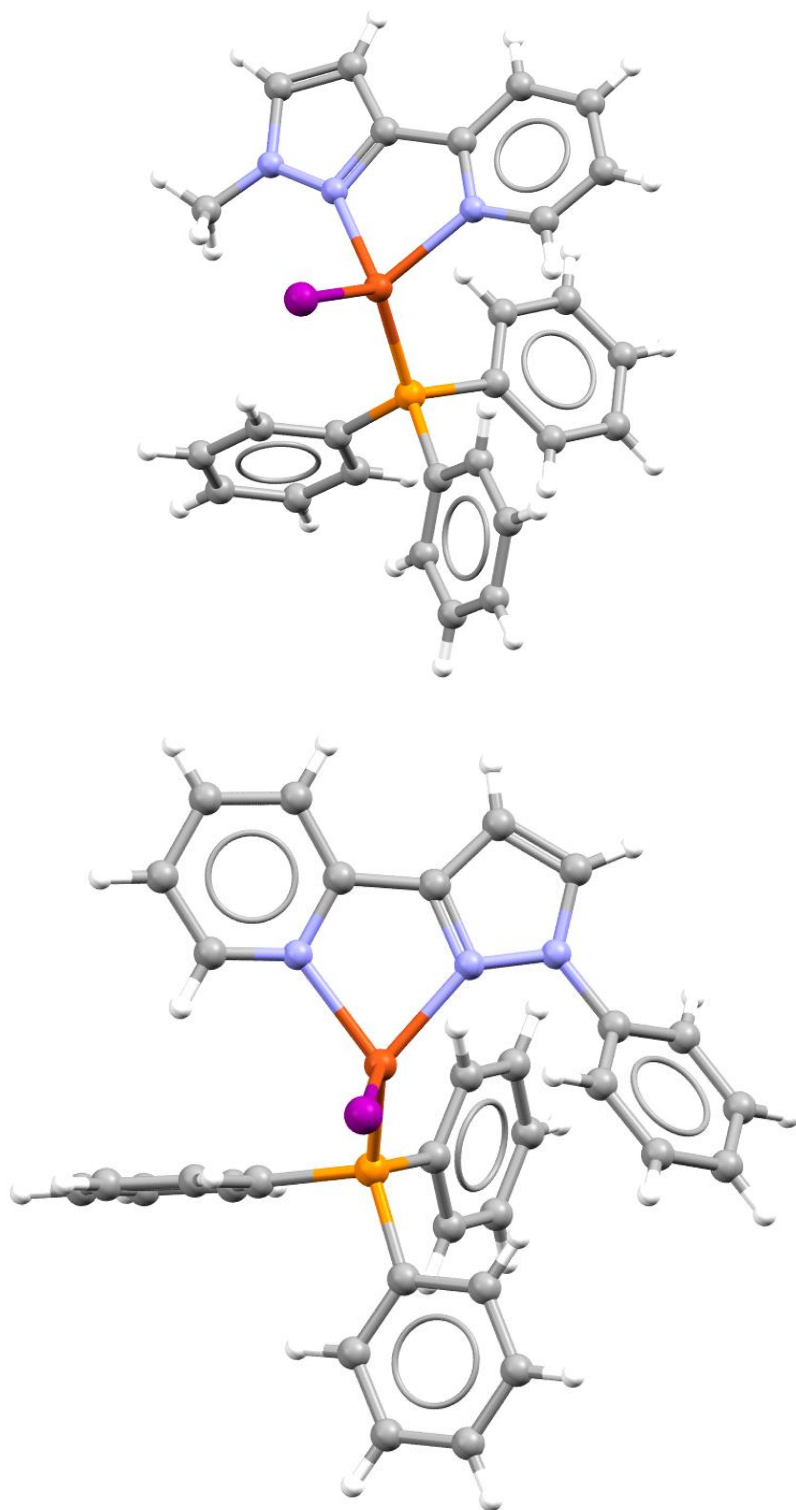

**Figure S19.** Molecular structure of complex **1** (top) and complex **2** (bottom).



**Table S14.** Crystal data and structure refinement for complex **1**.

|                                   |                                                                            |
|-----------------------------------|----------------------------------------------------------------------------|
| Empirical formula                 | C <sub>27</sub> H <sub>24</sub> CuIN <sub>3</sub> P [+ solvent]            |
| Formula weight                    | 611.90                                                                     |
| Temperature                       | 150(2) K                                                                   |
| Wavelength                        | 0.71073 Å                                                                  |
| Crystal system                    | Monoclinic                                                                 |
| Space group                       | P2 <sub>1</sub> /n                                                         |
| Unit cell dimensions              | a = 9.0460(10) Å<br>b = 14.9018(17) Å<br>c = 22.398(3) Å<br>β = 98.696(2)° |
| Volume                            | 2984.6(6) Å <sup>3</sup>                                                   |
| Z                                 | 4                                                                          |
| Density (calculated)              | 1.362 Mg/m <sup>3</sup>                                                    |
| Absorption coefficient            | 1.837 mm <sup>-1</sup>                                                     |
| F(000)                            | 1216                                                                       |
| Crystal size                      | 0.360 x 0.100 x 0.080 mm <sup>3</sup>                                      |
| Theta range for data collection   | 1.647 to 30.017°.                                                          |
| Index ranges                      | -12 ≤ h ≤ 10, -20 ≤ k ≤ 16, -31 ≤ l ≤ 31                                   |
| Reflections collected             | 28144                                                                      |
| Independent reflections           | 8616 [R(int) = 0.0444]                                                     |
| Completeness to theta = 25.242°   | 99.9 %                                                                     |
| Absorption correction             | Semi-empirical from equivalents                                            |
| Max. and min. transmission        | 0.7460 and 0.6229                                                          |
| Refinement method                 | Full-matrix least-squares on F <sup>2</sup>                                |
| Data / restraints / parameters    | 8616 / 0 / 299                                                             |
| Goodness-of-fit on F <sup>2</sup> | 1.015                                                                      |
| Final R indices [I > 2σ(I)]       | R1 = 0.0597, wR2 = 0.1307                                                  |
| R indices (all data)              | R1 = 0.0984, wR2 = 0.1501                                                  |
| Extinction coefficient            | n/a                                                                        |
| Largest diff. peak and hole       | 3.235 and -3.073 e.Å <sup>-3</sup>                                         |

**Table S15.** Bond lengths [Å] and angles [°] for complex **1**.

|                  |            |                   |           |
|------------------|------------|-------------------|-----------|
| Cu(1)-N(1)       | 2.069(4)   | P(1)-C(41)        | 1.823(5)  |
| Cu(1)-N(12)      | 2.121(4)   | C(21)-C(22)       | 1.394(6)  |
| Cu(1)-P(1)       | 2.2061(12) | C(21)-C(26)       | 1.394(7)  |
| Cu(1)-I(1)       | 2.6065(7)  | C(22)-C(23)       | 1.388(7)  |
| N(1)-N(2)        | 1.312(7)   | C(23)-C(24)       | 1.377(9)  |
| N(1)-C(5)        | 1.346(7)   | C(24)-C(25)       | 1.373(9)  |
| N(2)-C(6)        | 1.353(9)   | C(25)-C(26)       | 1.394(8)  |
| N(2)-C(3)        | 1.426(9)   | C(31)-C(36)       | 1.384(7)  |
| C(3)-C(4)        | 1.337(10)  | C(31)-C(32)       | 1.387(6)  |
| C(4)-C(5)        | 1.409(7)   | C(32)-C(33)       | 1.391(8)  |
| C(5)-C(11)       | 1.449(9)   | C(33)-C(34)       | 1.380(8)  |
| C(11)-N(12)      | 1.340(7)   | C(34)-C(35)       | 1.384(7)  |
| C(11)-C(16)      | 1.386(8)   | C(35)-C(36)       | 1.390(7)  |
| N(12)-C(13)      | 1.378(9)   | C(41)-C(42)       | 1.385(7)  |
| C(13)-C(14)      | 1.333(9)   | C(41)-C(46)       | 1.387(7)  |
| C(14)-C(15)      | 1.366(10)  | C(42)-C(43)       | 1.399(8)  |
| C(15)-C(16)      | 1.385(10)  | C(43)-C(44)       | 1.370(10) |
| P(1)-C(31)       | 1.820(5)   | C(44)-C(45)       | 1.378(10) |
| P(1)-C(21)       | 1.821(5)   | C(45)-C(46)       | 1.385(8)  |
|                  |            |                   |           |
| N(1)-Cu(1)-N(12) | 78.03(18)  | C(3)-C(4)-C(5)    | 105.7(6)  |
| N(1)-Cu(1)-P(1)  | 122.31(11) | N(1)-C(5)-C(4)    | 112.1(6)  |
| N(12)-Cu(1)-P(1) | 111.64(11) | N(1)-C(5)-C(11)   | 117.8(5)  |
| N(1)-Cu(1)-I(1)  | 106.35(12) | C(4)-C(5)-C(11)   | 130.0(5)  |
| N(12)-Cu(1)-I(1) | 112.78(11) | N(12)-C(11)-C(16) | 120.4(6)  |
| P(1)-Cu(1)-I(1)  | 118.85(4)  | N(12)-C(11)-C(5)  | 114.7(5)  |
| N(2)-N(1)-C(5)   | 104.2(5)   | C(16)-C(11)-C(5)  | 124.8(5)  |
| N(2)-N(1)-Cu(1)  | 141.2(4)   | C(11)-N(12)-C(13) | 116.9(5)  |
| C(5)-N(1)-Cu(1)  | 114.6(4)   | C(11)-N(12)-Cu(1) | 114.7(4)  |
| N(1)-N(2)-C(6)   | 119.5(6)   | C(13)-N(12)-Cu(1) | 128.3(4)  |
| N(1)-N(2)-C(3)   | 112.5(6)   | C(14)-C(13)-N(12) | 127.2(8)  |
| C(6)-N(2)-C(3)   | 127.9(6)   | C(13)-C(14)-C(15) | 113.7(8)  |

|                   |            |                   |          |
|-------------------|------------|-------------------|----------|
| C(4)-C(3)-N(2)    | 105.5(6)   | C(14)-C(15)-C(16) | 123.5(8) |
| C(15)-C(16)-C(11) | 118.2(6)   | C(36)-C(31)-P(1)  | 116.9(3) |
| C(31)-P(1)-C(21)  | 104.0(2)   | C(32)-C(31)-P(1)  | 124.0(4) |
| C(31)-P(1)-C(41)  | 102.1(2)   | C(31)-C(32)-C(33) | 119.7(5) |
| C(21)-P(1)-C(41)  | 102.8(2)   | C(34)-C(33)-C(32) | 121.3(5) |
| C(31)-P(1)-Cu(1)  | 116.42(14) | C(33)-C(34)-C(35) | 118.9(5) |
| C(21)-P(1)-Cu(1)  | 116.47(15) | C(34)-C(35)-C(36) | 120.2(5) |
| C(41)-P(1)-Cu(1)  | 113.12(15) | C(31)-C(36)-C(35) | 120.8(4) |
| C(22)-C(21)-C(26) | 118.6(5)   | C(42)-C(41)-C(46) | 119.0(5) |
| C(22)-C(21)-P(1)  | 123.9(4)   | C(42)-C(41)-P(1)  | 123.3(4) |
| C(26)-C(21)-P(1)  | 117.6(3)   | C(46)-C(41)-P(1)  | 117.7(4) |
| C(23)-C(22)-C(21) | 120.6(5)   | C(41)-C(42)-C(43) | 120.2(6) |
| C(24)-C(23)-C(22) | 119.9(5)   | C(44)-C(43)-C(42) | 119.9(6) |
| C(25)-C(24)-C(23) | 120.7(5)   | C(43)-C(44)-C(45) | 120.3(6) |
| C(24)-C(25)-C(26) | 119.6(6)   | C(44)-C(45)-C(46) | 119.9(6) |
| C(25)-C(26)-C(21) | 120.6(5)   | C(45)-C(46)-C(41) | 120.6(6) |
| C(36)-C(31)-C(32) | 119.1(5)   |                   |          |

---

**Table S16.** Torsion angles [°] for complex **1**.

|                         |           |                         |           |
|-------------------------|-----------|-------------------------|-----------|
| C(5)-N(1)-N(2)-C(6)     | -178.4(5) | P(1)-C(21)-C(22)-C(23)  | -178.4(4) |
| Cu(1)-N(1)-N(2)-C(6)    | -0.5(8)   | C(21)-C(22)-C(23)-C(24) | -0.5(8)   |
| C(5)-N(1)-N(2)-C(3)     | 0.2(5)    | C(22)-C(23)-C(24)-C(25) | -0.3(9)   |
| Cu(1)-N(1)-N(2)-C(3)    | 178.0(4)  | C(23)-C(24)-C(25)-C(26) | 1.2(10)   |
| N(1)-N(2)-C(3)-C(4)     | 0.1(6)    | C(24)-C(25)-C(26)-C(21) | -1.3(9)   |
| C(6)-N(2)-C(3)-C(4)     | 178.5(6)  | C(22)-C(21)-C(26)-C(25) | 0.5(8)    |
| N(2)-C(3)-C(4)-C(5)     | -0.3(5)   | P(1)-C(21)-C(26)-C(25)  | 179.5(4)  |
| N(2)-N(1)-C(5)-C(4)     | -0.3(5)   | C(21)-P(1)-C(31)-C(36)  | -165.0(4) |
| Cu(1)-N(1)-C(5)-C(4)    | -178.9(3) | C(41)-P(1)-C(31)-C(36)  | 88.3(4)   |
| N(2)-N(1)-C(5)-C(11)    | 177.5(4)  | Cu(1)-P(1)-C(31)-C(36)  | -35.4(4)  |
| Cu(1)-N(1)-C(5)-C(11)   | -1.0(5)   | C(21)-P(1)-C(31)-C(32)  | 17.9(5)   |
| C(3)-C(4)-C(5)-N(1)     | 0.4(5)    | C(41)-P(1)-C(31)-C(32)  | -88.9(5)  |
| C(3)-C(4)-C(5)-C(11)    | -177.2(5) | Cu(1)-P(1)-C(31)-C(32)  | 147.4(4)  |
| N(1)-C(5)-C(11)-N(12)   | -2.0(6)   | C(36)-C(31)-C(32)-C(33) | -1.4(8)   |
| C(4)-C(5)-C(11)-N(12)   | 175.4(4)  | P(1)-C(31)-C(32)-C(33)  | 175.7(5)  |
| N(1)-C(5)-C(11)-C(16)   | 179.3(4)  | C(31)-C(32)-C(33)-C(34) | 0.0(10)   |
| C(4)-C(5)-C(11)-C(16)   | -3.3(8)   | C(32)-C(33)-C(34)-C(35) | 0.1(10)   |
| C(16)-C(11)-N(12)-C(13) | 0.4(6)    | C(33)-C(34)-C(35)-C(36) | 1.1(9)    |
| C(5)-C(11)-N(12)-C(13)  | -178.3(4) | C(32)-C(31)-C(36)-C(35) | 2.6(8)    |
| C(16)-C(11)-N(12)-Cu(1) | -177.3(3) | P(1)-C(31)-C(36)-C(35)  | -174.7(4) |
| C(5)-C(11)-N(12)-Cu(1)  | 4.0(5)    | C(34)-C(35)-C(36)-C(31) | -2.5(8)   |
| C(11)-N(12)-C(13)-C(14) | 0.9(9)    | C(31)-P(1)-C(41)-C(42)  | 15.8(5)   |
| Cu(1)-N(12)-C(13)-C(14) | 178.3(5)  | C(21)-P(1)-C(41)-C(42)  | -91.8(5)  |
| N(12)-C(13)-C(14)-C(15) | -2.1(10)  | Cu(1)-P(1)-C(41)-C(42)  | 141.7(4)  |
| C(13)-C(14)-C(15)-C(16) | 2.1(9)    | C(31)-P(1)-C(41)-C(46)  | -163.7(4) |
| C(14)-C(15)-C(16)-C(11) | -1.0(9)   | C(21)-P(1)-C(41)-C(46)  | 88.7(4)   |
| N(12)-C(11)-C(16)-C(15) | -0.4(7)   | Cu(1)-P(1)-C(41)-C(46)  | -37.8(4)  |
| C(5)-C(11)-C(16)-C(15)  | 178.2(5)  | C(46)-C(41)-C(42)-C(43) | 0.3(8)    |
| C(31)-P(1)-C(21)-C(22)  | -86.2(4)  | P(1)-C(41)-C(42)-C(43)  | -179.3(5) |
| C(41)-P(1)-C(21)-C(22)  | 20.0(5)   | C(41)-C(42)-C(43)-C(44) | 0.5(10)   |
| Cu(1)-P(1)-C(21)-C(22)  | 144.3(4)  | C(42)-C(43)-C(44)-C(45) | -1.3(11)  |
| C(31)-P(1)-C(21)-C(26)  | 95.0(4)   | C(43)-C(44)-C(45)-C(46) | 1.4(10)   |

|                         |           |                         |          |
|-------------------------|-----------|-------------------------|----------|
| C(41)-P(1)-C(21)-C(26)  | -158.9(4) | C(44)-C(45)-C(46)-C(41) | -0.7(9)  |
| Cu(1)-P(1)-C(21)-C(26)  | -34.6(4)  | C(42)-C(41)-C(46)-C(45) | -0.2(8)  |
| C(26)-C(21)-C(22)-C(23) | 0.4(7)    | P(1)-C(41)-C(46)-C(45)  | 179.4(5) |

---

**Table S17.** Crystal data and structure refinement for complex **2**.

|                                   |                                                                             |
|-----------------------------------|-----------------------------------------------------------------------------|
| Empirical formula                 | C <sub>32</sub> H <sub>26</sub> CuIN <sub>3</sub> P                         |
| Formula weight                    | 673.97                                                                      |
| Temperature                       | 200(2) K                                                                    |
| Wavelength                        | 0.71073 Å                                                                   |
| Crystal system                    | Monoclinic                                                                  |
| Space group                       | C2/c                                                                        |
| Unit cell dimensions              | a = 25.4203(15) Å<br>b = 9.3752(5) Å<br>c = 24.4816(16) Å<br>β = 91.257(2)° |
| Volume                            | 5833.1(6) Å <sup>3</sup>                                                    |
| Z                                 | 8                                                                           |
| Density (calculated)              | 1.535 Mg/m <sup>3</sup>                                                     |
| Absorption coefficient            | 1.888 mm <sup>-1</sup>                                                      |
| F(000)                            | 2688                                                                        |
| Crystal size                      | 0.300 x 0.200 x 0.080 mm <sup>3</sup>                                       |
| Theta range for data collection   | 1.603 to 29.218°.                                                           |
| Index ranges                      | -34 ≤ h ≤ 34, -8 ≤ k ≤ 12, -33 ≤ l ≤ 33                                     |
| Reflections collected             | 33330                                                                       |
| Independent reflections           | 7848 [R(int) = 0.0579]                                                      |
| Completeness to theta = 25.242°   | 99.8 %                                                                      |
| Absorption correction             | Semi-empirical from equivalents                                             |
| Max. and min. transmission        | 0.7458 and 0.5513                                                           |
| Refinement method                 | Full-matrix least-squares on F <sup>2</sup>                                 |
| Data / restraints / parameters    | 7848 / 0 / 343                                                              |
| Goodness-of-fit on F <sup>2</sup> | 1.128                                                                       |
| Final R indices [I > 2σ(I)]       | R1 = 0.0550, wR2 = 0.1102                                                   |
| R indices (all data)              | R1 = 0.0778, wR2 = 0.1198                                                   |
| Extinction coefficient            | n/a                                                                         |
| Largest diff. peak and hole       | 1.804 and -1.043 e.Å <sup>-3</sup>                                          |

**Table S18.** Bond lengths [Å] and angles [°] for complex **2**.

|                  |            |                   |           |
|------------------|------------|-------------------|-----------|
| Cu(1)-N(1)       | 2.062(3)   | N(2)-C(3)         | 1.356(5)  |
| Cu(1)-N(12)      | 2.116(3)   | N(2)-C(6)         | 1.436(5)  |
| Cu(1)-P(1)       | 2.1968(11) | C(3)-C(4)         | 1.367(6)  |
| Cu(1)-I(1)       | 2.6127(6)  | C(4)-C(5)         | 1.392(6)  |
| N(1)-C(5)        | 1.345(5)   | C(5)-C(12)        | 1.463(6)  |
| N(1)-N(2)        | 1.351(5)   | C(6)-C(7)         | 1.379(6)  |
| C(6)-C(11)       | 1.382(6)   | C(22)-C(23)       | 1.398(8)  |
| C(7)-C(8)        | 1.395(6)   | C(23)-C(24)       | 1.367(9)  |
| C(8)-C(9)        | 1.375(7)   | C(24)-C(25)       | 1.376(9)  |
| C(9)-C(10)       | 1.369(8)   | C(25)-C(26)       | 1.393(7)  |
| C(10)-C(11)      | 1.396(7)   | C(31)-C(32)       | 1.379(7)  |
| C(12)-N(12)      | 1.346(5)   | C(31)-C(36)       | 1.393(6)  |
| C(12)-C(16)      | 1.396(5)   | C(32)-C(33)       | 1.375(8)  |
| N(12)-C(13)      | 1.345(5)   | C(33)-C(34)       | 1.372(9)  |
| C(13)-C(14)      | 1.387(6)   | C(34)-C(35)       | 1.369(9)  |
| C(14)-C(15)      | 1.375(7)   | C(35)-C(36)       | 1.389(8)  |
| C(15)-C(16)      | 1.390(6)   | C(41)-C(46)       | 1.381(7)  |
| P(1)-C(41)       | 1.822(4)   | C(41)-C(42)       | 1.383(7)  |
| P(1)-C(31)       | 1.831(5)   | C(42)-C(43)       | 1.393(7)  |
| P(1)-C(21)       | 1.834(4)   | C(43)-C(44)       | 1.367(10) |
| C(21)-C(22)      | 1.379(6)   | C(44)-C(45)       | 1.363(10) |
| C(21)-C(26)      | 1.382(6)   | C(45)-C(46)       | 1.394(7)  |
|                  |            |                   |           |
| N(1)-Cu(1)-N(12) | 78.32(13)  | C(7)-C(6)-C(11)   | 121.4(4)  |
| N(1)-Cu(1)-P(1)  | 120.58(9)  | C(7)-C(6)-N(2)    | 119.3(4)  |
| N(12)-Cu(1)-P(1) | 120.43(10) | C(11)-C(6)-N(2)   | 119.3(4)  |
| N(1)-Cu(1)-I(1)  | 112.52(9)  | C(6)-C(7)-C(8)    | 119.0(4)  |
| N(12)-Cu(1)-I(1) | 102.98(10) | C(9)-C(8)-C(7)    | 120.3(5)  |
| P(1)-Cu(1)-I(1)  | 115.60(4)  | C(10)-C(9)-C(8)   | 120.0(4)  |
| C(5)-N(1)-N(2)   | 105.0(3)   | C(9)-C(10)-C(11)  | 121.0(5)  |
| C(5)-N(1)-Cu(1)  | 115.1(3)   | C(6)-C(11)-C(10)  | 118.4(5)  |
| N(2)-N(1)-Cu(1)  | 139.0(2)   | N(12)-C(12)-C(16) | 122.3(4)  |

|                   |            |                   |          |
|-------------------|------------|-------------------|----------|
| N(1)-N(2)-C(3)    | 111.5(3)   | N(12)-C(12)-C(5)  | 114.8(3) |
| N(1)-N(2)-C(6)    | 119.8(3)   | C(16)-C(12)-C(5)  | 122.8(4) |
| C(3)-N(2)-C(6)    | 128.7(4)   | C(13)-N(12)-C(12) | 118.2(3) |
| N(2)-C(3)-C(4)    | 107.1(4)   | C(13)-N(12)-Cu(1) | 127.1(3) |
| C(3)-C(4)-C(5)    | 105.6(4)   | C(12)-N(12)-Cu(1) | 114.5(3) |
| N(1)-C(5)-C(4)    | 110.8(4)   | N(12)-C(13)-C(14) | 123.0(4) |
| N(1)-C(5)-C(12)   | 116.7(3)   | C(15)-C(14)-C(13) | 118.3(4) |
| C(4)-C(5)-C(12)   | 132.5(4)   | C(14)-C(15)-C(16) | 120.0(4) |
| C(15)-C(16)-C(12) | 118.1(4)   | C(36)-C(31)-P(1)  | 122.4(4) |
| C(41)-P(1)-C(31)  | 101.47(19) | C(33)-C(32)-C(31) | 120.2(5) |
| C(41)-P(1)-Cu(1)  | 117.21(15) | C(34)-C(33)-C(32) | 121.3(6) |
| C(31)-P(1)-Cu(1)  | 118.23(15) | C(35)-C(34)-C(33) | 119.4(5) |
| C(21)-P(1)-Cu(1)  | 109.66(13) | C(34)-C(35)-C(36) | 119.9(5) |
| C(22)-C(21)-C(26) | 118.9(4)   | C(35)-C(36)-C(31) | 120.7(5) |
| C(22)-C(21)-P(1)  | 124.1(4)   | C(46)-C(41)-C(42) | 118.8(4) |
| C(26)-C(21)-P(1)  | 116.9(3)   | C(46)-C(41)-P(1)  | 124.3(4) |
| C(21)-C(22)-C(23) | 119.6(5)   | C(42)-C(41)-P(1)  | 116.9(4) |
| C(24)-C(23)-C(22) | 121.0(5)   | C(41)-C(42)-C(43) | 120.4(6) |
| C(23)-C(24)-C(25) | 119.9(5)   | C(44)-C(43)-C(42) | 120.4(6) |
| C(24)-C(25)-C(26) | 119.2(6)   | C(45)-C(44)-C(43) | 119.4(5) |
| C(21)-C(26)-C(25) | 121.4(5)   | C(44)-C(45)-C(46) | 121.1(6) |
| C(32)-C(31)-C(36) | 118.4(5)   | C(41)-C(46)-C(45) | 119.8(6) |
| C(32)-C(31)-P(1)  | 119.2(4)   |                   |          |

---



**Table S19.** Torsion angles [°] for complex **2**.

|                         |           |                         |           |
|-------------------------|-----------|-------------------------|-----------|
| C(5)-N(1)-N(2)-C(3)     | 0.5(4)    | N(2)-N(1)-C(5)-C(12)    | 179.2(3)  |
| Cu(1)-N(1)-N(2)-C(3)    | 168.7(3)  | Cu(1)-N(1)-C(5)-C(12)   | 7.7(4)    |
| C(5)-N(1)-N(2)-C(6)     | 177.8(3)  | C(3)-C(4)-C(5)-N(1)     | 0.0(5)    |
| Cu(1)-N(1)-N(2)-C(6)    | -14.0(6)  | C(3)-C(4)-C(5)-C(12)    | -179.4(4) |
| N(1)-N(2)-C(3)-C(4)     | -0.5(5)   | N(1)-N(2)-C(6)-C(7)     | -39.9(5)  |
| C(6)-N(2)-C(3)-C(4)     | -177.5(4) | C(3)-N(2)-C(6)-C(7)     | 136.8(5)  |
| N(2)-C(3)-C(4)-C(5)     | 0.3(5)    | N(1)-N(2)-C(6)-C(11)    | 141.3(4)  |
| N(2)-N(1)-C(5)-C(4)     | -0.4(4)   | C(3)-N(2)-C(6)-C(11)    | -42.0(6)  |
| Cu(1)-N(1)-C(5)-C(4)    | -171.8(3) | C(11)-C(6)-C(7)-C(8)    | -1.4(7)   |
| N(2)-C(6)-C(7)-C(8)     | 179.9(4)  | P(1)-C(21)-C(26)-C(25)  | 176.2(4)  |
| C(6)-C(7)-C(8)-C(9)     | 0.7(8)    | C(24)-C(25)-C(26)-C(21) | 0.2(8)    |
| C(7)-C(8)-C(9)-C(10)    | 0.4(8)    | C(41)-P(1)-C(31)-C(32)  | -145.3(4) |
| C(8)-C(9)-C(10)-C(11)   | -0.8(9)   | C(21)-P(1)-C(31)-C(32)  | 106.6(4)  |
| C(7)-C(6)-C(11)-C(10)   | 1.0(8)    | Cu(1)-P(1)-C(31)-C(32)  | -15.6(5)  |
| N(2)-C(6)-C(11)-C(10)   | 179.8(5)  | C(41)-P(1)-C(31)-C(36)  | 35.1(5)   |
| C(9)-C(10)-C(11)-C(6)   | 0.1(9)    | C(21)-P(1)-C(31)-C(36)  | -73.0(5)  |
| N(1)-C(5)-C(12)-N(12)   | -7.5(5)   | Cu(1)-P(1)-C(31)-C(36)  | 164.8(4)  |
| C(4)-C(5)-C(12)-N(12)   | 171.9(4)  | C(36)-C(31)-C(32)-C(33) | -0.6(8)   |
| N(1)-C(5)-C(12)-C(16)   | 171.8(4)  | P(1)-C(31)-C(32)-C(33)  | 179.8(5)  |
| C(4)-C(5)-C(12)-C(16)   | -8.7(7)   | C(31)-C(32)-C(33)-C(34) | 1.5(10)   |
| C(16)-C(12)-N(12)-C(13) | -0.5(6)   | C(32)-C(33)-C(34)-C(35) | -1.6(11)  |
| C(5)-C(12)-N(12)-C(13)  | 178.8(4)  | C(33)-C(34)-C(35)-C(36) | 0.9(11)   |
| C(16)-C(12)-N(12)-Cu(1) | -175.8(3) | C(34)-C(35)-C(36)-C(31) | 0.0(10)   |
| C(5)-C(12)-N(12)-Cu(1)  | 3.6(4)    | C(32)-C(31)-C(36)-C(35) | -0.1(9)   |
| C(12)-N(12)-C(13)-C(14) | 0.6(7)    | P(1)-C(31)-C(36)-C(35)  | 179.5(5)  |
| Cu(1)-N(12)-C(13)-C(14) | 175.1(4)  | C(31)-P(1)-C(41)-C(46)  | -99.7(4)  |
| N(12)-C(13)-C(14)-C(15) | 0.0(7)    | C(21)-P(1)-C(41)-C(46)  | 8.6(5)    |
| C(13)-C(14)-C(15)-C(16) | -0.5(7)   | Cu(1)-P(1)-C(41)-C(46)  | 130.0(4)  |
| C(14)-C(15)-C(16)-C(12) | 0.5(6)    | C(31)-P(1)-C(41)-C(42)  | 78.4(4)   |
| N(12)-C(12)-C(16)-C(15) | 0.0(6)    | C(21)-P(1)-C(41)-C(42)  | -173.3(4) |
| C(5)-C(12)-C(16)-C(15)  | -179.3(4) | Cu(1)-P(1)-C(41)-C(42)  | -51.9(4)  |
| C(41)-P(1)-C(21)-C(22)  | -102.3(4) | C(46)-C(41)-C(42)-C(43) | 3.5(8)    |

|                         |           |                         |           |
|-------------------------|-----------|-------------------------|-----------|
| C(31)-P(1)-C(21)-C(22)  | 3.8(4)    | P(1)-C(41)-C(42)-C(43)  | -174.7(5) |
| Cu(1)-P(1)-C(21)-C(22)  | 131.5(4)  | C(41)-C(42)-C(43)-C(44) | -1.2(9)   |
| C(41)-P(1)-C(21)-C(26)  | 82.3(4)   | C(42)-C(43)-C(44)-C(45) | -1.7(9)   |
| C(31)-P(1)-C(21)-C(26)  | -171.6(3) | C(43)-C(44)-C(45)-C(46) | 2.2(9)    |
| Cu(1)-P(1)-C(21)-C(26)  | -44.0(4)  | C(42)-C(41)-C(46)-C(45) | -3.0(8)   |
| C(26)-C(21)-C(22)-C(23) | -0.6(7)   | P(1)-C(41)-C(46)-C(45)  | 175.1(4)  |
| P(1)-C(21)-C(22)-C(23)  | -176.0(4) | C(44)-C(45)-C(46)-C(41) | 0.1(8)    |
| C(21)-C(22)-C(23)-C(24) | -0.1(9)   |                         |           |
| C(22)-C(23)-C(24)-C(25) | 0.8(9)    |                         |           |
| C(23)-C(24)-C(25)-C(26) | -0.9(9)   |                         |           |
| C(22)-C(21)-C(26)-C(25) | 0.5(7)    |                         |           |

---
